**Title:** Evaluation of nanopore sequencing on polar bodies for routine pre-implantation genetic testing for aneuploidy.

**Running Title:** Nanopore polar body aneuploidy screening

**Authors:**

Anna Oberle<sup>1</sup>, Franziska Hanzer<sup>1</sup>, Felix Kokocinski<sup>2</sup>, Anna Ennemoser<sup>1</sup>, Luca Carli<sup>1</sup>, Enrico Vaccari<sup>1</sup>, Markus Hengstschläger<sup>1</sup>, Michael Feichtinger<sup>1\*</sup>

**Affiliation:**

<sup>1</sup> Wunschbaby Institut Feichtinger, Lainzer Straße 6, 1130 Vienna, Austria

<sup>2</sup> Gene-Test Bioinformatics Solutions, Jakob-Müller-Str. 16, 68623 Lampertheim, Germany

**\*Corresponding author:** Michael Feichtinger, [michael.feichtinger@wunschbaby.at](mailto:michael.feichtinger@wunschbaby.at), +43 1 8777775, Lainzerstrasse 6, 1130 Vienna, Austria

**Keywords:** PGT-A, Polar Body Biopsy, Nanopore Sequencing, Oxford Nanopore Technology, Cost effective PGT-A

**Structured Abstract:****BACKGROUND**

PGT-A using polar body (PB) biopsy derives a clinical benefit by reducing the number of embryo transfers and miscarriage rates but is currently not cost-efficient. Nanopore sequencing technology opens possibilities by providing cost-efficient, fast sequencing results with uncomplicated sample preparation workflows.

**METHODS**

In this comparative experimental study, 102 pooled PB samples from 20 patients were analyzed for aneuploidy using nanopore sequencing technology and compared with aCGH results generated as part of the clinical routine. Samples were sequenced on a Nanopore MinION machine for up to 9 hours for 6 pooled PB samples. Whole-chromosome copy-numbers were called by a custom bioinformatic analysis software. Automatically called results were compared to aCGH results.

**RESULTS**

Overall, 96/99 samples were consistently detected as euploid or aneuploid in both methods (concordance=97.0%, sensitivity = 0.957, specificity = 1.0, PPV = 1.0, NPV = 0.906). On chromosomal level, concordance reached 98.7%. Chromosomal aneuploidies analyzed in this trial covered all 23 chromosomes with 98 trisomies, and 97 monosomies in 70 aCGH samples.

The whole nanopore workflow is feasible in under 5 hours (for one sample) with maximum time of 16 hours (for 12 samples), enabling fresh PB-euploid embryo transfer. Material cost of 150€/sample possibly enable cost-efficient aneuploidy screening.

**CONCLUSIONS**

This is the first study, systematically comparing nanopore sequencing for aneuploidy of PBs with standard detection methods. High concordance rates confirmed feasibility of nanopore technology for this application. Additionally, the fast and cost-efficient workflow reveals clinical utility of this technology, making PB PGT-A clinically attractive.

## 1 **Introduction**

2 With increasing female age, the probability for aneuploid embryos increases and with  
3 it the risk of age-related infertility, abortions and children born with aneuploidies (1).

4 Early pregnancy loss and spontaneous abortions are most frequently caused by  
5 chromosomal abnormalities of the embryo (2). In contrast to maternal age, paternal  
6 age plays a minor role for chromosomal abnormalities (3). Preimplantation-genetic  
7 testing for aneuploidy (PGT-A) is used to screen for unbalanced chromosomal  
8 distributions before implantation and can therefore reduce miscarriage rates and  
9 improve pregnancy and life-birth rates per embryo-transfer, especially in patients with  
10 advanced-maternal age (4,5).

11 DNA analyzed in PGT-A can originate from trophectoderm cells, blastomere cells or  
12 polar bodies (PBs). All three sources have advantages and specific limitations. While  
13 PB analysis allows the detection of meiotic maternal aneuploidies only, the analysis  
14 of trophectoderm biopsy (TEB) and blastomere biopsy can detect embryogenic  
15 aneuploidies. However, blastomere biopsy can possibly damage the embryo (6,7)  
16 and was shown to provide limited clinical benefit (8) and is therefore not commonly  
17 performed anymore. In TEB analysis, which is currently seen as the gold standard for  
18 PGT-A, diagnosed trophectoderm aneuploidies might differ from embryogenic  
19 material of the inner cell mass due to mosaicisms (9). Embryos classified as  
20 aneuploid or mosaic by TEB can lead to euploid, healthy life-births, indicating  
21 discordances between inner cell mass and trophectoderm or self-repair mechanisms  
22 (10,11).

23 In contrast, PGT-A using PB biopsy leaves less room for interpretation, since mitotic  
24 errors in cell division leading to mosaicisms are not detected here. In a large  
25 multicenter randomized clinical trial ('ESHRE Study into the Evaluation of oocyte

26 Euploidy by Microarray analysis', ESTEEM trial), PGT-A using PB was shown to  
27 significantly reduce the number of embryo transfer needed for live birth, reduce  
28 number of cryopreserved embryos and reduce miscarriage rates (12). These findings  
29 highlight the clinical benefit for PGT-A using PB. In contrast to PGT-A using TEB, PB  
30 biopsy allows fresh embryo transfer and can avoid freeze-all procedures.  
31 Additionally, due to legal restrictions for TEB analysis in several European countries,  
32 PB biopsy is often the only option and is performed frequently in countries like  
33 Germany or Austria (13,14).

34 However, PB analysis was previously stated to be not cost effective (15,16).  
35 Lowering the cost for PB-based PGT-A and PGT-A in general is therefore an  
36 important goal to improve patient acceptance and accessibility.

37 PGT-A is often performed using short-read next-generation sequencing (NGS), which  
38 requires high initial investment costs and high running expenses. Third-generation  
39 sequencing using nanopores is a novel technology with the potential to perform  
40 sequencing in a fast, easy, and cost-effective way, enabling application even in small  
41 and less well-financed clinics (17). Continuous development of the technology led to  
42 significant improvements in sequencing quality (18,19).

43 Feasibility of nanopore sequencing for PGT was mainly shown for structural variants  
44 and monogenetic disease (20–24), which comes with high costs and is far from  
45 clinical routine (22). PGT-A from TEB samples using nanopore sequencing was first  
46 demonstrated in a small pilot study (25). A follow-up study compared their optimized  
47 nanopore aneuploidy analysis of 52 chorionic villi samples, 50 amniotic fluid samples,  
48 64 placental or fetal tissue samples and 52 TEB samples with standard NGS PGT-A  
49 screening (26). Overall, the authors saw very good concordance rates. The optimized  
50 nanopore workflow was notably faster (2-6 hours) and more cost-effective (around 50

51 US\$ sequencing cost per sample) compared to traditional NGS screening (26). In a  
52 recent study, single and multiple cells as well as 96 TEB samples were analyzed for  
53 PGT-A and segmental aneuploidies using nanopore sequencing, again confirming  
54 high concordance rates above 95% with commercial kits for PGT-A (27). However,  
55 further clinical studies are needed to transfer the technology into clinical PGT-A  
56 routine analysis.

57 In the present study, pooled PBs from 102 oocytes were analyzed using nanopore  
58 sequencing and compared to results generated as part of the clinical routine using  
59 array comparative genomic hybridization (aCGH). This is the first study that analyses  
60 aneuploidy from PB samples using nanopore sequencing technology including  
61 detailed cost analysis of the nanopore sequencing workflow.

## 62 **Material and Methods**

### 63 *Study design and sampling:*

In this comparative study, 102 pooled PB samples from 20 patients treated for infertility between March and December 2022 were prospectively collected and analyzed for aneuploidy using nanopore sequencing technology. Nanopore sequencing results were compared with aCGH results generated as part of the clinical routine. All patients participating in this trial were treated for infertility at 'Wunschbaby Institut Feichtinger' (WIF) in Vienna and chose aneuploidy screening of their polar bodies. All patients provided written informed consent. The study was approved by the Ethic Committee of the Medical University Vienna (EK-1249/2022). After oocyte pick-up and fertilization by intracytoplasmic sperm injection (ICSI), both PBs 1 and 2 were taken simultaneously 16 to 18 hours after fertilization and placed in one sterile PCR tube with 2.5 µl of fresh, sterile phosphate-buffered saline (PBS). Opening of the zona pellucida was performed using RI Saturn 5 Active™ (Research Instruments Ltd, UK). PB samples were frozen at -20°C and transported to an external genetic diagnostic laboratory for routine analysis.

### 64 *DNA Amplification and reference analysis:*

65 PGT-A routine analysis of pooled PBs was performed after the standard GentiSure  
66 Pre-Screen Kit for Single Cell Analysis Kit (Agilent Technologies, USA) protocol,  
67 including Whole Genome Amplification (WGA) with REPLI-g Single Cell Kit using a  
68 phi29 polymerase process (QIAGEN, Germany), Fluorescent Labeling and CGH  
69 Microarray. This standard protocol was adapted for PB diagnosis. Around 5µg of  
70 WGA aliquots from PB samples were anonymized and used for nanopore  
71 sequencing.

### 72 *Nanopore Library Preparation:*

73 After receiving anonymized WGA DNA samples, quality was confirmed by agarose  
74 gel electrophoresis (Thermo Fisher Scientific, USA) and quantity was measured by  
75 Qubit 4 fluorometer (Thermo Fisher Scientific, Singapore). Then WGA DNA was  
76 purified using gDNA Clean & Concentrator-25 columns (Zymo Research, USA).

77 As part of the protocol optimization, around 1.5 µg of purified DNA was prepared for  
78 some samples by digestion of single-stranded regions using T7 Endonuclease I (New  
79 England Biolabs (NEB), UK) to reduce or remove branched structures which were  
80 introduced during amplification. DNA was purified using gDNA Clean & Concentrator-  
81 25 columns (Zymo Research, USA) and eluted in 50µl nuclease-free water.

82 For library preparation, the Oxford Nanopore Technology (ONT, UK) Kits 'Ligation  
83 Sequencing Kit' (SQL-LSK109) and 'Native Barcoding Expansion' (EXP-NBD104)  
84 were used according to manufacturer's recommendations, as previously tested in a  
85 pre-clinical trial (28).

86 Briefly, 1 - 1.5 µg purified DNA was repaired and end-prepared using NEBNext®  
87 FFPE DNA Repair and Ultra™ II End-prep Mix (both from NEB, UK) and purified  
88 using DNA Clean & Concentrator-5 columns (Zymo Research). For native barcode  
89 ligation, 500 to 700 ng DNA was incubated using ONT Native Barcodes and Blunt/TA  
90 Ligase Master Mix (NEB) and purified using DNA Clean & Concentrator-5 columns  
91 (Zymo Research). Purified, barcoded DNA samples for one sequencing run (between  
92 4 to 8 samples, see Supplementary Table S1) were pooled equimolar in one tube  
93 and ligated to AMII adapters (ONT) with NEBNext® Quick Ligation Reaction Buffer  
94 and Quick T4 DNA Ligase (both NEB). For the final clean-up, 0.5x SPRIselect beads  
95 (Beckman Coulter, USA) were utilized to ensure elimination of small DNA fragments  
96 and washed with Short Fragment Buffer (ONT) before elution.

97 *Nanopore sequencing:*



98 The sequencing-ready library was primed and loaded on a MinION R9.4 flow cell  
99 (FLO-MIN106D, ONT) according to manufactures recommendation using 25-50 fmol  
100 DNA library. Sequencing was performed on MinION Mk1C with simultaneous base  
101 calling using standard base calling settings and quality threshold (minimum Q-score)  
102 of 8. Sequencing time was adapted according to number of samples pooled and  
103 quality of the flow cell (pores available) with average sequencing time of around 9  
104 hours for 6 pooled PB samples resulting in a median number of 105,670 reads (after  
105 pre-processing, stdev= 76,444) and 210 Mbases (stdev=100) generated per sample  
106 (detail sequencing constitution, time and output in Supplementary Table S1).

107 *Data analysis:*

108 Nanopore's *MinKNOW* software system controls the raw data acquisition, performing  
109 basecalling and demultiplexing with *Guppy* as well as FASTQ file creation. Following  
110 on, a data analysis pipeline was applied, developed for long read-based PGT-A data  
111 using standard bioinformatics tools and custom software scripts. The specific  
112 processing steps are described in the following.

113 Primary data analysis consisted of read cleaning with *Porechop* (Porechop,  
114 RRID:SCR\_016967) and *Nanofilt* (29), alignment to the human genome GRCh38  
115 with *minimap2* (30) and creation of BAM files with *samtools* (31). Secondary  
116 processing steps made use of the *QDNAseq* R software package (32) and include  
117 binning of reads using a custom 500 kb bin matrix, GC content and mappability  
118 correction, median and reference normalisation, smoothing, segmentation and copy-  
119 number calling. A set of five samples were used as a combined reference to capture  
120 experiment-specific bias. They represented the first few samples of the study with a  
121 representative profile and without whole-chromosome copy-number changes as  
122 assessed by aCGH. Further processing was performed to filter and summarize the

123 data, producing a report with genome-wide copy-number plots, noise measurements  
124 and automatically detected changes per chromosome and sample. Samples with  
125 more than 3 aneuploid chromosomes were classified as 'multiple'.

126 As quality measures of the nanopore sequencing samples, MAPD (Median of the  
127 Absolute values of all Pairwise Differences) and noise (median standard deviation of  
128 normalised read counts within each segment) values are reported for all  
129 chromosomes as well as for each sample and automatically plotted in the  
130 chromosomal distribution plots. Samples resulting in a total noise value greater than  
131 0.6 and MAPD value greater than 1.7 were excluded from the comparison  
132 (Supplementary Table S1).

## 133 **Results**

134 In this study, 102 pooled PB samples from 20 patients were analyzed for PGT-A by  
135 nanopore sequencing and compared to clinical routine PGT-A analysis by aCGH. All  
136 samples were successfully amplified while a negative control (culture medium) for  
137 each batch showed no amplification and aCGH was performed for all 102 PB  
138 samples. WGA aliquots were anonymized and used for nanopore sequencing.  
139 Schematic study design is shown in Figure 1.

140

### 141 *Quality control and genome coverage for nanopore sequencing workflow:*

142 In total three samples were excluded from the comparison. Two samples (PB61,  
143 PB95) were excluded due to failed or uninterpretable aCGH (2 %) and one sample  
144 (PB48, 1%) was excluded due to failed quality check after nanopore sequencing with  
145 noise and MAPD values below quality threshold.

146 Data analysis from nanopore sequencing results revealed medium sequencing  
147 output of 210 Mbases and a median of 105,670 reads per sample (after pre-  
148 processing, 70 to 650 Mbases and 32,924 to 374,841 reads). A median of 3% (88  
149 Mbases) of the genome was covered by one or more reads (between 0.9 – 9.3%).  
150 With the 0.5 Mbases bin matrix applied in the analysis, a smoothing window of 6 bins  
151 and a calling limit of 20 bins, the application has a theoretical resolution of around 10  
152 Mbases. This is comparable with the common resolution for PGT-A using aCGH or  
153 NGS (6-10 Mbases) (33). Average Q-score of all nanopore-sequenced samples was  
154 8. Quality was additionally verified in the bioinformatic data analysis pipeline by noise  
155 and MAPD values. Average noise of all samples was 0.428 (between 0.230 and  
156 0.724) and average MAPD was 1.164 (between 0.720 and 1.809). All noise and

157 MAPD values are listed in Supplementary Table S1 and relationship between both  
158 quality measures is visualized in Supplementary Figure S1.

159

160 *Comparison of PGT-A results from nanopore sequencing with routine aCGH results:*

161 In total, 99 pooled PB samples for PGT-A screening were utilized in this study for  
162 comparison of aCGH with nanopore sequencing workflow. From these, 29 were  
163 detected euploid (29.3 %) and 70 were detected aneuploid (70.7 %) by aCGH  
164 reference. This is expected, given the patient cohort with medium female age of 40.5  
165 years. Nanopore sequencing analysis detected 32 samples as euploid and 67 as  
166 aneuploid resulting in 97.0 % sample-level concordance and a sensitivity of 0.957,  
167 specificity of 1.0 with a positive predictive value (PPV) of 1.0 and a negative  
168 predictive value (NPV) of 0.906 (Figure 1). The results of all aCGH and nanopore  
169 sequencing analyses are listed in Table 1. Three samples detected as aneuploid  
170 using aCGH revealed an euploid chromosomal pattern using nanopore sequencing.  
171 All three samples showed a single aneuploid chromosome (+22, +19, -16,  
172 respectively) by aCGH and these elevations or reductions were visible but below  
173 threshold at nanopore sequencing, as listed in Supplementary Table S1.

174 In total, aCGH analysis detected 195 aneuploid chromosomes in the 99 samples,  
175 with 98 trisomies and 97 monosomies covering all 23 chromosomes, shown in Figure  
176 3. Counting the exact match (all chromosomes concordant but assigning “multiple” to  
177 karyotypes with more than three aberrations), we found 91.9% (karyotype-level)  
178 concordance (91 of 99 samples showing exact match), as listed in Table 1. On  
179 chromosomal level, we found 98,7% concordance (2244 of 2273 chromosomes were  
180 concordantly identified as normal or abnormal). Sensitivity was 0.901, specificity  
181 0.995, PPV 0.945 and NPV 0.991 per chromosome. Segmental changes were not

182 addressed in this study. Example chromosomal distribution plots of euploid and  
183 aneuploid detected samples, which are automatically created from bioinformatic data  
184 analysis pipeline after nanopore sequencing are shown in Figure 4.

185 To assist the physicians and patients in the process of decision-making, a further  
186 critical evaluation of euploid-detected PBs can be performed and marginal/borderline  
187 elevated or reduced chromosomes can be mentioned together with the euploid result  
188 in the clinical report. Here, we performed manual revision of all euploid-detected  
189 samples after nanopore sequencing and the additional information about slightly  
190 elevated or reduced chromosomes can be found in Supplementary Table S1.

191

192 *Endonuclease digestion step:*

193 As part of this study, we evaluated the importance of an endonuclease digestion  
194 step. 28 samples were run in parallel with and without endonuclease digestion step.  
195 While samples with a high signal to noise ratio show matching results, the additional  
196 digestion clearly reduces noise and improves calling for challenging cases. Reduction  
197 of average noise and MAPD values, as well as improvements of sequencing-output  
198 per time is shown in Supplementary Figure S2. Detailed comparison of sequencing  
199 results with and without endonuclease digest is listed in Supplementary Table S2.  
200 For the calculation of concordance between aCGH and nanopore sequencing, results  
201 after Endonuclease digest were utilized for all these samples. For all new  
202 investigations we recommend adding this step.

203

204 *Detailed time and cost calculation:*

205 To evaluate if nanopore sequencing for PGT-A can be utilized in clinical routine, we  
206 performed a detailed time and cost analysis for our nanopore sequencing workflow,

207 which is listed in Supplementary Tables S3 and S4. The nanopore sequencing  
208 workflow used in this study starting from amplified DNA until ploidy result is feasible  
209 in one and a half hours with one sample being sequenced separately. For 12  
210 samples being sequenced in parallel, the workflow is feasible in around 12 hours  
211 (Supplementary Table S3). Amplification of the pooled PB additionally take between  
212 1.5 hours and 4.5 hours per sample, depending on the WGA kit. In our study, WGA  
213 was performed using REPLig Single Cell Kit (QIAGEN) with a 2.5 h amplification  
214 protocol.

215 Material cost for the whole workflow, including WGA, sample preparation, sequencing  
216 and data analysis range from 100€ to 220€ per sample. A detailed list of time and  
217 cost calculation for different scenarios is shown in Supplementary Table S3 and S4.  
218 Initial investment cost for nanopore sequencing can be neglected because prices for  
219 nanopore starter packages, where MinION sequencing machines are included cover  
220 material costs.

221

## 222 **Discussion**

223 The present study is the first study that systematically compares PB PGT-A analysis  
224 using nanopore sequencing with routine aCGH analysis. The concordance rate  
225 between both technologies found in this study was 97% for euploid/aneuploid sample  
226 decision and 99% on chromosomal level. These concordance rates are high, given  
227 the different nature of the methods and the delicate sample type of PB biopsy. Similar  
228 studies comparing different technologies for PGT-A analysis received slightly higher  
229 concordance rates (26,34–36). However, genetic material utilized in these studies  
230 was originated from TEB, which comprises significantly more genetic starting material  
231 than PB biopsy, resulting in more stable and uniform whole genome amplification.  
232 From 102 PB samples analyzed with nanopore sequencing in our study, 101 samples  
233 passed the quality threshold, indicating a high reliability of the technology.

234

235 Nanopore sequencing has several advantages, compared to aCGH or NGS analysis,  
236 including but not limited to the fast turnaround time, inexpensive sequencing, as well  
237 as small initial investment costs needed. These advantages might lead to cost-  
238 efficient diagnostics for clinical applications. Time and cost of nanopore sequencing  
239 for clinical reproductive healthcare has been reported in several publications, but  
240 detailed statements on how these number can be achieved are often not stated  
241 (20,25,26,37). Here, we provide detailed insight in material costs and preparation,  
242 sequencing, and data analysis time for different scenarios (Supplementary Table S3  
243 and S4).

244 Another advantage of nanopore sequencing compared to aCGH or NGS is the high  
245 flexibility of the sequencing method. Sequencing data as well as quality measures of  
246 the data generated, and the flow cell health can be monitored in real-time during

247 nanopore sequencing. If more data is required or quality of the library is poor,  
248 sequencing can easily be prolonged or repeated on the same flow cell until enough  
249 data is generated. This can reduce the necessity to repeat uninterpretable results  
250 and can reduce prolonged time-to diagnosis, increasing the possibility for same-cycle  
251 transfer of euploid embryos, leading again to a cost reduction by reducing freeze-all  
252 procedures and hormonal treatment for the embryo transfer, possibly leading to a  
253 shorter time-to-pregnancy.

254

255 A possible limitation of the study derives from the reference method. In a comparable  
256 study using nanopore sequencing in comparison with standard clinical detection  
257 methods (NGS, aCGH or fluorescence in situ hybridization, FISH), discordant  
258 aneuploidy results were re-examined and the initial nanopore sequencing results  
259 were confirmed in these samples, showing that even established clinical testing  
260 methods like FISH or aCGH might result in misdiagnosis (26). Misdiagnosis of routine  
261 aCGH PGT-A analysis has also been shown in a study comparing aCGH with NGS  
262 results (35). In the present study using material from pooled PBs, re-examination of  
263 aCGH was not possible due to limited sample resource.

264 For some samples in this study, the reference result remained unclear, due to  
265 increased noise and limited resolution of the aCGH method. In particular, the small  
266 chromosomes show higher variability in both platforms. Discordant results could  
267 originate from different thresholds defined in aCGH and nanopore sequencing,  
268 different analysis bias and bias reduction (in the nanopore workflow, bias was  
269 reduced through binning, GC content and mappability correction, median and  
270 reference normalisation), or different genome coverage and resolution. Although the  
271 reference method has been extensively validated (5) and is applied in clinical routine



272 since 2015, the utilization of pooled PBs, analyzed with aCGH might come with some  
273 technical limitations, including limited resolution and the necessity for manual  
274 revision. While the assessment and quantification of the nanopore sequencing  
275 results is clearer, manual review is still recommended and sometimes required. A  
276 larger study with follow-up data or a clinical non-selection trial would be beneficial for  
277 increased confidence.

278 Utilizing pooled PBs, compared to analyzing PB 1 and 2 separately, requires more  
279 sensitive detection methods, since variations from normal euploid chromosomes  
280 depict less distinct in pooled PBs. However, if properly validated (5), pooling PBs can  
281 considerably reduce the costs and the workload of the analysis.

282

283 Independent of the technology, the analysis of chromosomal material is complicated  
284 by different characteristics of human chromosomes (38). The short chromosomes  
285 19, 20, 21, 22 and Y provide limited material which leads to an increased variability in  
286 measurements. The GC-richest chromosomes 16, 17, 19 and 22 often display  
287 increased levels of noise. Also, chromosomes with heterochromatic polymorphisms,  
288 like chromosomes 1, 9 and 16 differ due to normal, benign variations in  
289 heterochromatin-content, which can be visualized by microscopy but are hard to  
290 interpret in sequencing-based methods or aCGH (39). In our study, the  
291 chromosomes 9, 19, 21 and 22 showed most discordances (Figure 3).

292

293 Although manual review of the chromosomal distribution of each sample is  
294 recommended, our data analysis pipeline automatically generates the sequencing  
295 plot with significantly abnormal chromosomes being highlighted and quality measures  
296 (noise and MAPD) are plotted for each chromosome. The karyotype is reported

297 automatically according to the optimized bioinformatic pipeline. This automation  
298 together with the clear and easy-to-read karyotype plot makes the nanopore  
299 sequencing data very easy to understand and interpret. Interpretation of the results  
300 does not require years of expert knowledge and experience, which is often required  
301 for the interpretation of aCGH plots. The automated analysis pipeline is not  
302 dependent on subjective decision-making of the responsible geneticist or physician.

303 Nevertheless, following the clinical practice, we additionally performed manual review  
304 of all euploid-detected samples (Supplementary Table S1). This additional annotation  
305 about slight chromosomal aberrations does not change the automatically reported  
306 result (euploid) but can be provided as additional information in the medical report.  
307 This report can facilitate the embryo prioritization and decision-making for the  
308 physician and the patients as part of their fertility treatment.

309

310 Taken together, pooled PB nanopore sequencing revealed high concordance rates  
311 compared to conventional aCGH with minimized time and financial resources  
312 required.

### **Acknowledgements**

We would like to thank all patients participating in this study. We also thank all staff members from HLN Genetic GmbH for providing the reference samples.

## References

1. Franasiak JM, Forman EJ, Hong KH, Werner MD, Upham KM, Treff NR, et al. The nature of aneuploidy with increasing age of the female partner: a review of 15,169 consecutive trophoctoderm biopsies evaluated with comprehensive chromosomal screening. *Fertil Steril* 2014;101(3).
2. Petracchi F, Colaci DS, Igarzabal L, Gadow E. Cytogenetic analysis of first trimester pregnancy loss. *Int J Gynaecol Obstet* 2009;104(3):243–4.
3. Fonseka KGL, Griffin DK. Is there a paternal age effect for aneuploidy? *Cytogenet Genome Res* 2011;133(2–4):280–91.
4. Rubio C, Bellver J, Rodrigo L, Castellón G, Guillén A, Vidal C, et al. In vitro fertilization with preimplantation genetic diagnosis for aneuploidies in advanced maternal age: a randomized, controlled study. *Fertil Steril* 2017;107(5):1122–9.
5. Feichtinger M, Stopp T, Göbl C, Feichtinger E, Vaccari E, Mädler U, et al. Increasing Live Birth Rate by Preimplantation Genetic Screening of Pooled Polar Bodies Using Array Comparative Genomic Hybridization. *PLoS One* 2015;10(5):e0128317.
6. Cohen J, Wells D, Munné S. Removal of 2 cells from cleavage stage embryos is likely to reduce the efficacy of chromosomal tests that are used to enhance implantation rates. 2007;87(3):496–503.
7. Scott RT, Upham KM, Forman EJ, Zhao T, Treff NR. Cleavage-stage biopsy significantly impairs human embryonic implantation potential while blastocyst biopsy does not: a randomized and paired clinical trial. *Fertil Steril* 2013;100(3):624–30.
8. Mastenbroek S, Twisk M, van Echten-Arends J, Sikkema-Raddatz B, Korevaar JC, Verhoeve HR, et al. In Vitro Fertilization with Preimplantation Genetic

- Screening. *N Engl J Med* 2007;357(1):9–17.
9. Viotti M, Victor AR, Barnes FL, Zouves CG, Besser AG, Grifo JA, et al. Using outcome data from one thousand mosaic embryo transfers to formulate an embryo ranking system for clinical use. *Fertil Steril* 2021;115(5):1212–24.
  10. Greco E, Minasi MG, Fiorentino F. Healthy Babies after Intrauterine Transfer of Mosaic Aneuploid Blastocysts. *N Engl J Med* 2015;373(21):2089–90.
  11. Treff NR, Marin D. The “mosaic” embryo: misconceptions and misinterpretations in preimplantation genetic testing for aneuploidy. *Fertil Steril* 2021;116(5):1205–11.
  12. Verpoest W, Staessen C, Bossuyt PM, Goossens V, Altarescu G, Bonduelle M, et al. Preimplantation genetic testing for aneuploidy by microarray analysis of polar bodies in advanced maternal age: a randomized clinical trial. *Hum Reprod* 2018;33(9):1767–76.
  13. Hengstschläger M, Feichtinger W. Die erste Präimplantationsdiagnostik in Österreich. *Wien Klin Wochenschr* 2005;117(21–22):725–7.
  14. Ven K van der, Montag M, Ven H van der. Polar Body Diagnosis – A Step in The Right Direction? *Dtsch Arztebl Int* 2008;
  15. Neumann K, Griesinger G. An Economic Analysis of Aneuploidy Screening of Oocytes in Assisted Reproduction in Germany. *Geburtshilfe Frauenheilkd* 2020;80(2):172–8.
  16. Neumann K, Sermon K, Bossuyt P, Goossens V, Geraedts J, Traeger-Synodinos J, et al. An economic analysis of preimplantation genetic testing for aneuploidy by polar body biopsy in advanced maternal age. *BJOG An Int J Obstet Gynaecol* 2020;127(6):710–8.
  17. Cabibbe AM, Spitaleri A, Battaglia S, Colman RE, Suresh A, Uplekar S, et al.

- Application of Targeted Next-Generation Sequencing Assay on a Portable Sequencing Platform for Culture-Free Detection of Drug-Resistant Tuberculosis from Clinical Samples. *J Clin Microbiol* 2020;58(10).
18. Amarasinghe SL, Su S, Dong X, Zappia L, Ritchie ME, Gouil Q. Opportunities and challenges in long-read sequencing data analysis. *Genome Biol* 2020;21(1).
  19. Jain M, Koren S, Miga KH, Quick J, Rand AC, Sasani TA, et al. Nanopore sequencing and assembly of a human genome with ultra-long reads. *Nat Biotechnol* 2018 364 2018;36(4):338–45.
  20. Cretu Stancu M, van Roosmalen MJ, Renkens I, Nieboer MM, Middelkamp S, de Ligt J, et al. Mapping and phasing of structural variation in patient genomes using nanopore sequencing. *Nat Commun* 2017;8(1):1326.
  21. Pei Z, Deng K, Lei C, Du D, Yu G, Sun X, et al. Identifying Balanced Chromosomal Translocations in Human Embryos by Oxford Nanopore Sequencing and Breakpoints Region Analysis. *Front Genet* 2022;0:2723.
  22. Margolis C, Werner M, J alas C. Variant haplophasing by long-read sequencing: proof of concept in preimplantation genetic workup and an opportunity to distinguish balanced and normal embryos. *Fertil Steril* 2021;116(3):668–9.
  23. Hu L, Liang F, Cheng D, Zhang Z, Yu G, Zha J, et al. Location of Balanced Chromosome-Translocation Breakpoints by Long-Read Sequencing on the Oxford Nanopore Platform. *Front Genet* 2019;10(January):1313.
  24. Madjunkova S, Sundaravadanam Y, Antes R, Abramov R, Chen S, Yin Y, et al. Detection of Structural Rearrangements in Embryos. *N Engl J Med* 2020;382(25):2472–4.
  25. Wei S, Weiss ZR, Gaur P, Forman E, Williams Z. Rapid preimplantation

- genetic screening using a handheld, nanopore-based DNA sequencer. *Fertil Steril* 2018;110(5):910-916.e2.
26. Wei S, Djandji A, Lattin MT, Nahum O, Hoffman N, Cujar C, et al. Rapid Nanopore Sequencing-Based Screen for Aneuploidy in Reproductive Care. *N Engl J Med* 2022;387(7):658–60.
  27. Tan VJ, Liu T, Arifin Z, Pak B, Tan ASC, Wong S, et al. Third-Generation Single-Molecule Sequencing for Preimplantation Genetic Testing of Aneuploidy and Segmental Imbalances. *Clin Chem* 2023;00(0):1–9.
  28. Oberle A, Carli L, Ennemoser A, Hengstschläger M, Feichtinger M. P-533 Single-cell long-read nanopore sequencing as a fast and cost-efficient method for aneuploidy detection and potentially PGT-A, a pre-clinical study. *Hum Reprod* 2022;37(Supplement\_1).
  29. De Coster W, D'Hert S, Schultz DT, Cruts M, Van Broeckhoven C. NanoPack: visualizing and processing long-read sequencing data. *Bioinformatics* 2018;34(15):2666–9.
  30. Li H. Minimap2: pairwise alignment for nucleotide sequences. *Bioinformatics* 2018;34(18):3094–100.
  31. Li H, Handsaker B, Wysoker A, Fennell T, Ruan J, Homer N, et al. The Sequence Alignment/Map format and SAMtools. *Bioinformatics* 2009;25(16):2078–9.
  32. Scheinin I, Sie D, Bengtsson H, van de Wiel MA, Olshen AB, van Thuijl HF, et al. DNA copy number analysis of fresh and formalin-fixed specimens by shallow whole-genome sequencing with identification and exclusion of problematic regions in the genome assembly. *Genome Res* 2014;24(12):2022–32.

33. Snider AC, Darwin T, Spor L, Akinwole A, Cinnioglu C, Kayali R. Criteria to evaluate patterns of segmental and complete aneuploidies in preimplantation genetic testing for aneuploidy results suggestive of an inherited balanced translocation or inversion. *F&S Reports* 2021;2(1):72–9.
34. Kung A, Munné S, Bankowski B, Coates A, Wells D. Validation of next-generation sequencing for comprehensive chromosome screening of embryos. *Reprod Biomed Online* 2015;31(6):760–9.
35. Sachdeva K, Discutido R, Albuz F, Almekosh R, Peramo B. Validation of Next-Generation Sequencer for 24-Chromosome Aneuploidy Screening in Human Embryos. *Genet Test Mol Biomarkers* 2017;21(11):674–80.
36. Walters-Sen L, Neitzel D, Bristow SL, Mitchell A, Alouf CA, Aradhya S, et al. Experience analyzing >190,000 embryo trophectoderm biopsies using a novel FAST-SeqS PGT assay. *Reprod Biomed Online* 2021;
37. Bartalucci N, Romagnoli S, Contini E, Marseglia G, Magi A, Guglielmelli P, et al. Long Reads, Short Time: Feasibility of Prenatal Sample Karyotyping by Nanopore Genome Sequencing. *Clin Chem* 2019;65(12):1604–5.
38. Piovesan A, Pelleri MC, Antonaros F, Strippoli P, Caracausi M, Vitale L. On the length, weight and GC content of the human genome. *BMC Res Notes* 2019;12(1):106.
39. Hernandez-Nieto C, Gayete-Lafuente S, Alkon-Meadows T, Lee J, Luna-Rojas M, Mukherjee T, et al. Parental chromosomal heteromorphisms are not associated with an increased risk of embryo aneuploidy. *JBRA Assist Reprod* 2021;25(4):575–80.

## Figure Legends:

**Figure 1: Study design including concordance rates found in this study.** WGA: whole-genome amplification; PGT-A: preimplantation-genetic testing for aneuploidy; aCGH: array comparative genomic hybridization; PPV and NPV: positive and negative predictive value.

**Figure 2: Schematic overview of the nanopore sequencing workflow, including time measures for individual procedures, embedded in the clinical PGT-A workflow.** Prorate sequencing time per sample was calculated according to medium sequencing time for 6 pooled samples. Separate sequencing of one sample can be shorter. ICSI: intra-cytoplasmic sperm injection; PB: polar body; WGA: whole-genome amplification.

**Figure 3: Occurrence of whole-chromosome aneuploidies in all 99 pooled PB samples.** TP: true positive, FN: false negative, FP: false positive.

**Figure 4: Example chromosomal distribution plots from automatically generated nanopore sequencing workflow.** Quality values noise and MAPD are mapped for each chromosome and thresholds for the total sample (0.6 and 1.7, respectively) are highlighted in red. MAPD: Median of the Absolute values of all Pairwise Differences; noise: median standard deviation of normalised read counts within each segment.



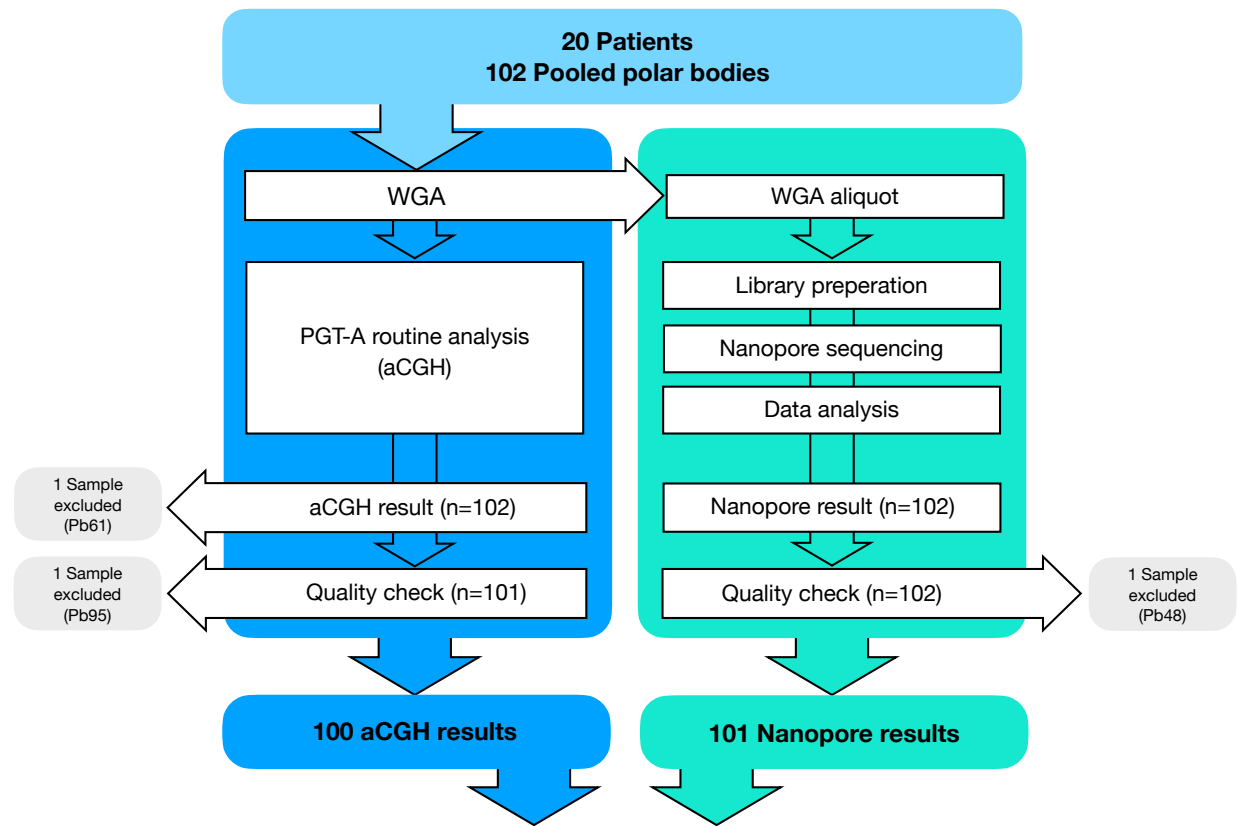

| Concordance rates (n=99) |           |                | Concordance, Sensitivity, Specificity, PPV, NPV |                      |                                                                                                                                                                                                                                      |             |        |             |       |             |     |     |     |     |       |
|--------------------------|-----------|----------------|-------------------------------------------------|----------------------|--------------------------------------------------------------------------------------------------------------------------------------------------------------------------------------------------------------------------------------|-------------|--------|-------------|-------|-------------|-----|-----|-----|-----|-------|
| Ploidy status            |           | Concordance    | Nanopore result                                 |                      |                                                                                                                                                                                                                                      |             |        |             |       |             |     |     |     |     |       |
| aCGH                     | Nanopore  |                | aneuploid                                       | euploid              |                                                                                                                                                                                                                                      |             |        |             |       |             |     |     |     |     |       |
| euploid                  | euploid   | MATCH (n=29)   | True Positive (n=67)                            | False Negative (n=3) | <table border="1"> <tr><td>Concordance</td><td>97.0 %</td></tr> <tr><td>Sensitivity</td><td>0.957</td></tr> <tr><td>Specificity</td><td>1.0</td></tr> <tr><td>PPV</td><td>1.0</td></tr> <tr><td>NPV</td><td>0.906</td></tr> </table> | Concordance | 97.0 % | Sensitivity | 0.957 | Specificity | 1.0 | PPV | 1.0 | NPV | 0.906 |
| Concordance              | 97.0 %    |                |                                                 |                      |                                                                                                                                                                                                                                      |             |        |             |       |             |     |     |     |     |       |
| Sensitivity              | 0.957     |                |                                                 |                      |                                                                                                                                                                                                                                      |             |        |             |       |             |     |     |     |     |       |
| Specificity              | 1.0       |                |                                                 |                      |                                                                                                                                                                                                                                      |             |        |             |       |             |     |     |     |     |       |
| PPV                      | 1.0       |                |                                                 |                      |                                                                                                                                                                                                                                      |             |        |             |       |             |     |     |     |     |       |
| NPV                      | 0.906     |                |                                                 |                      |                                                                                                                                                                                                                                      |             |        |             |       |             |     |     |     |     |       |
| aneuploid                | aneuploid | MATCH (n=67)   |                                                 |                      |                                                                                                                                                                                                                                      |             |        |             |       |             |     |     |     |     |       |
| euploid                  | aneuploid | MISMATCH (n=0) | False Positive (n=0)                            | True Negative (n=29) |                                                                                                                                                                                                                                      |             |        |             |       |             |     |     |     |     |       |
| aneuploid                | euploid   | MISMATCH (n=3) |                                                 |                      |                                                                                                                                                                                                                                      |             |        |             |       |             |     |     |     |     |       |

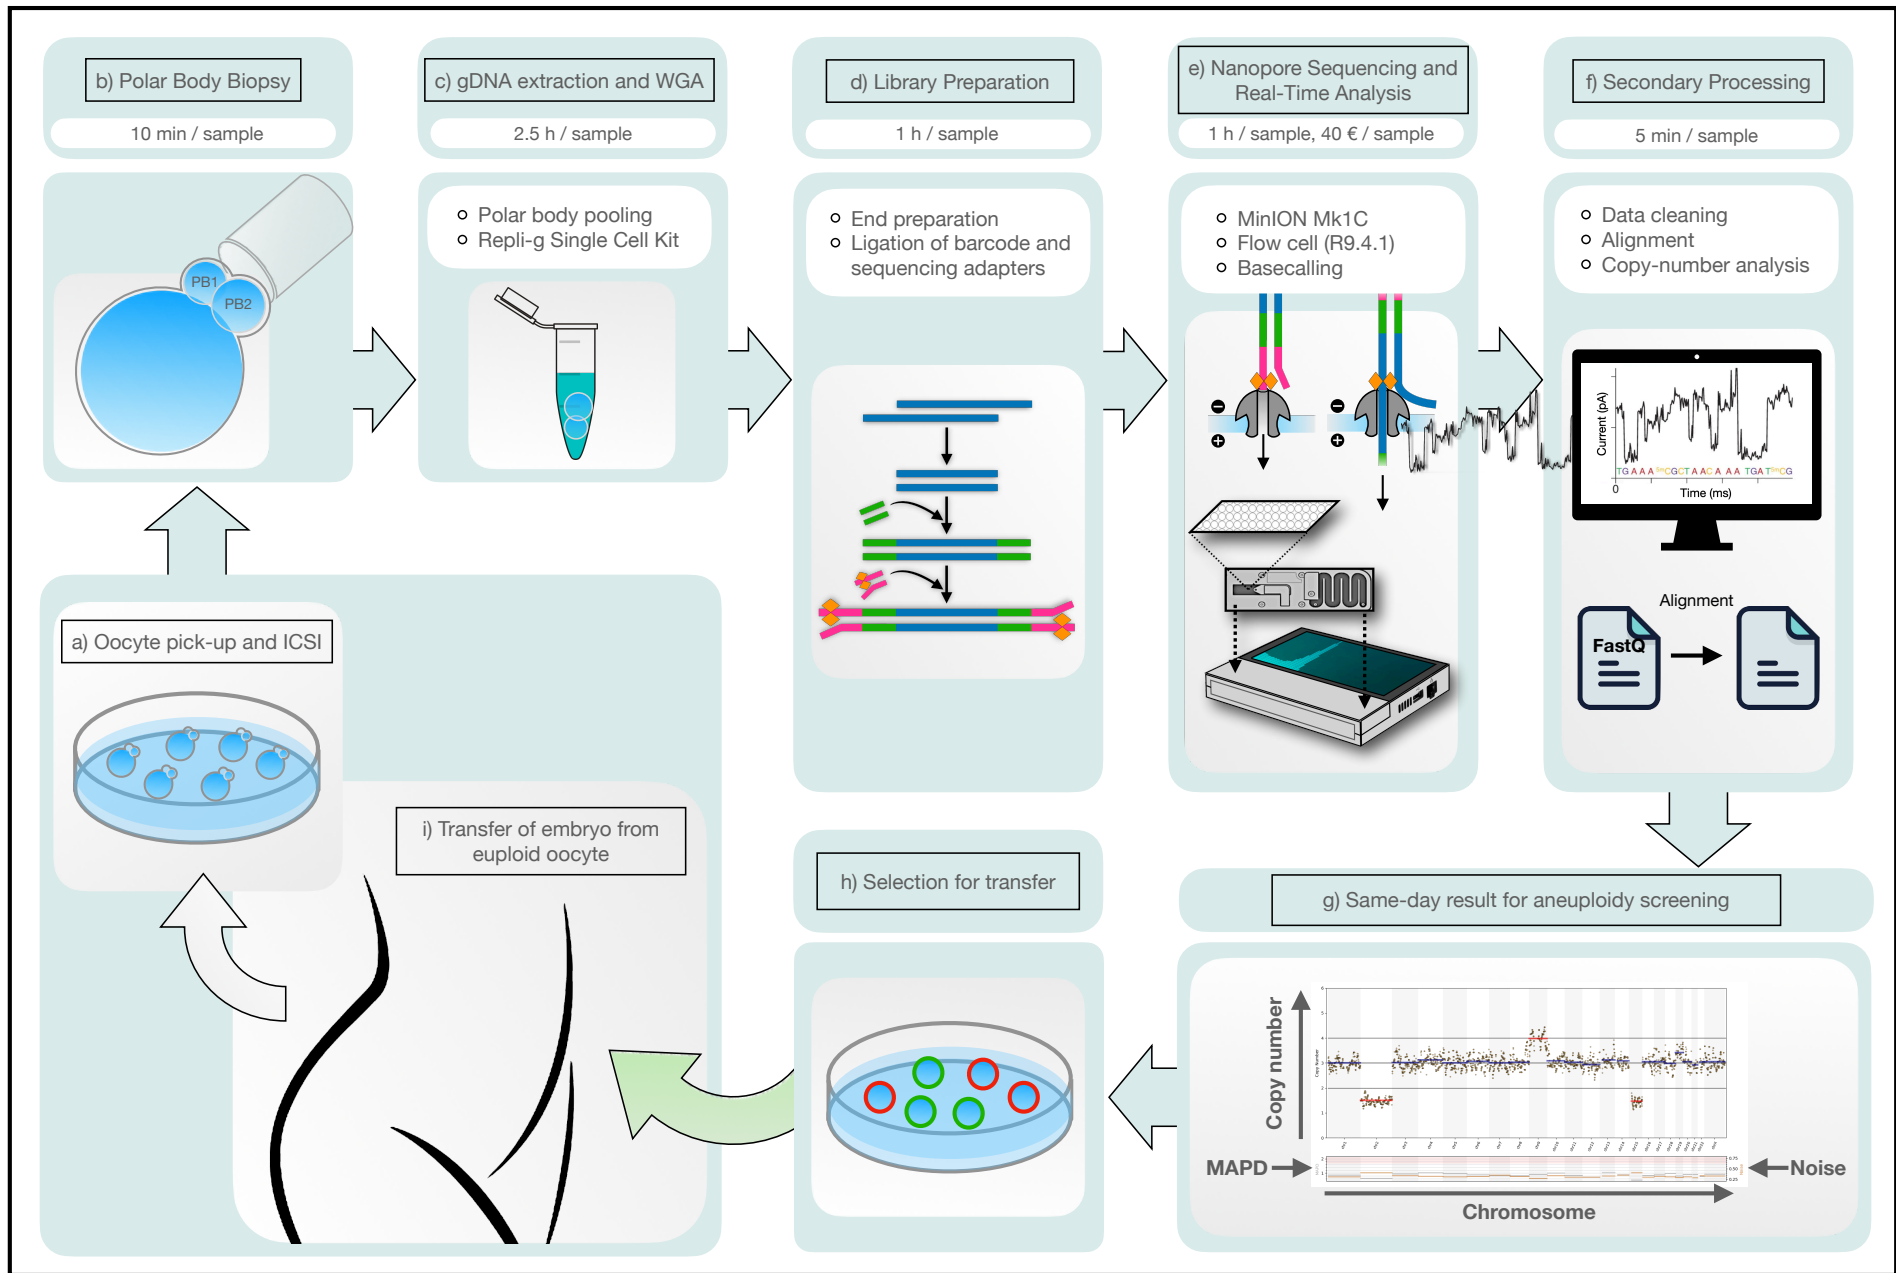

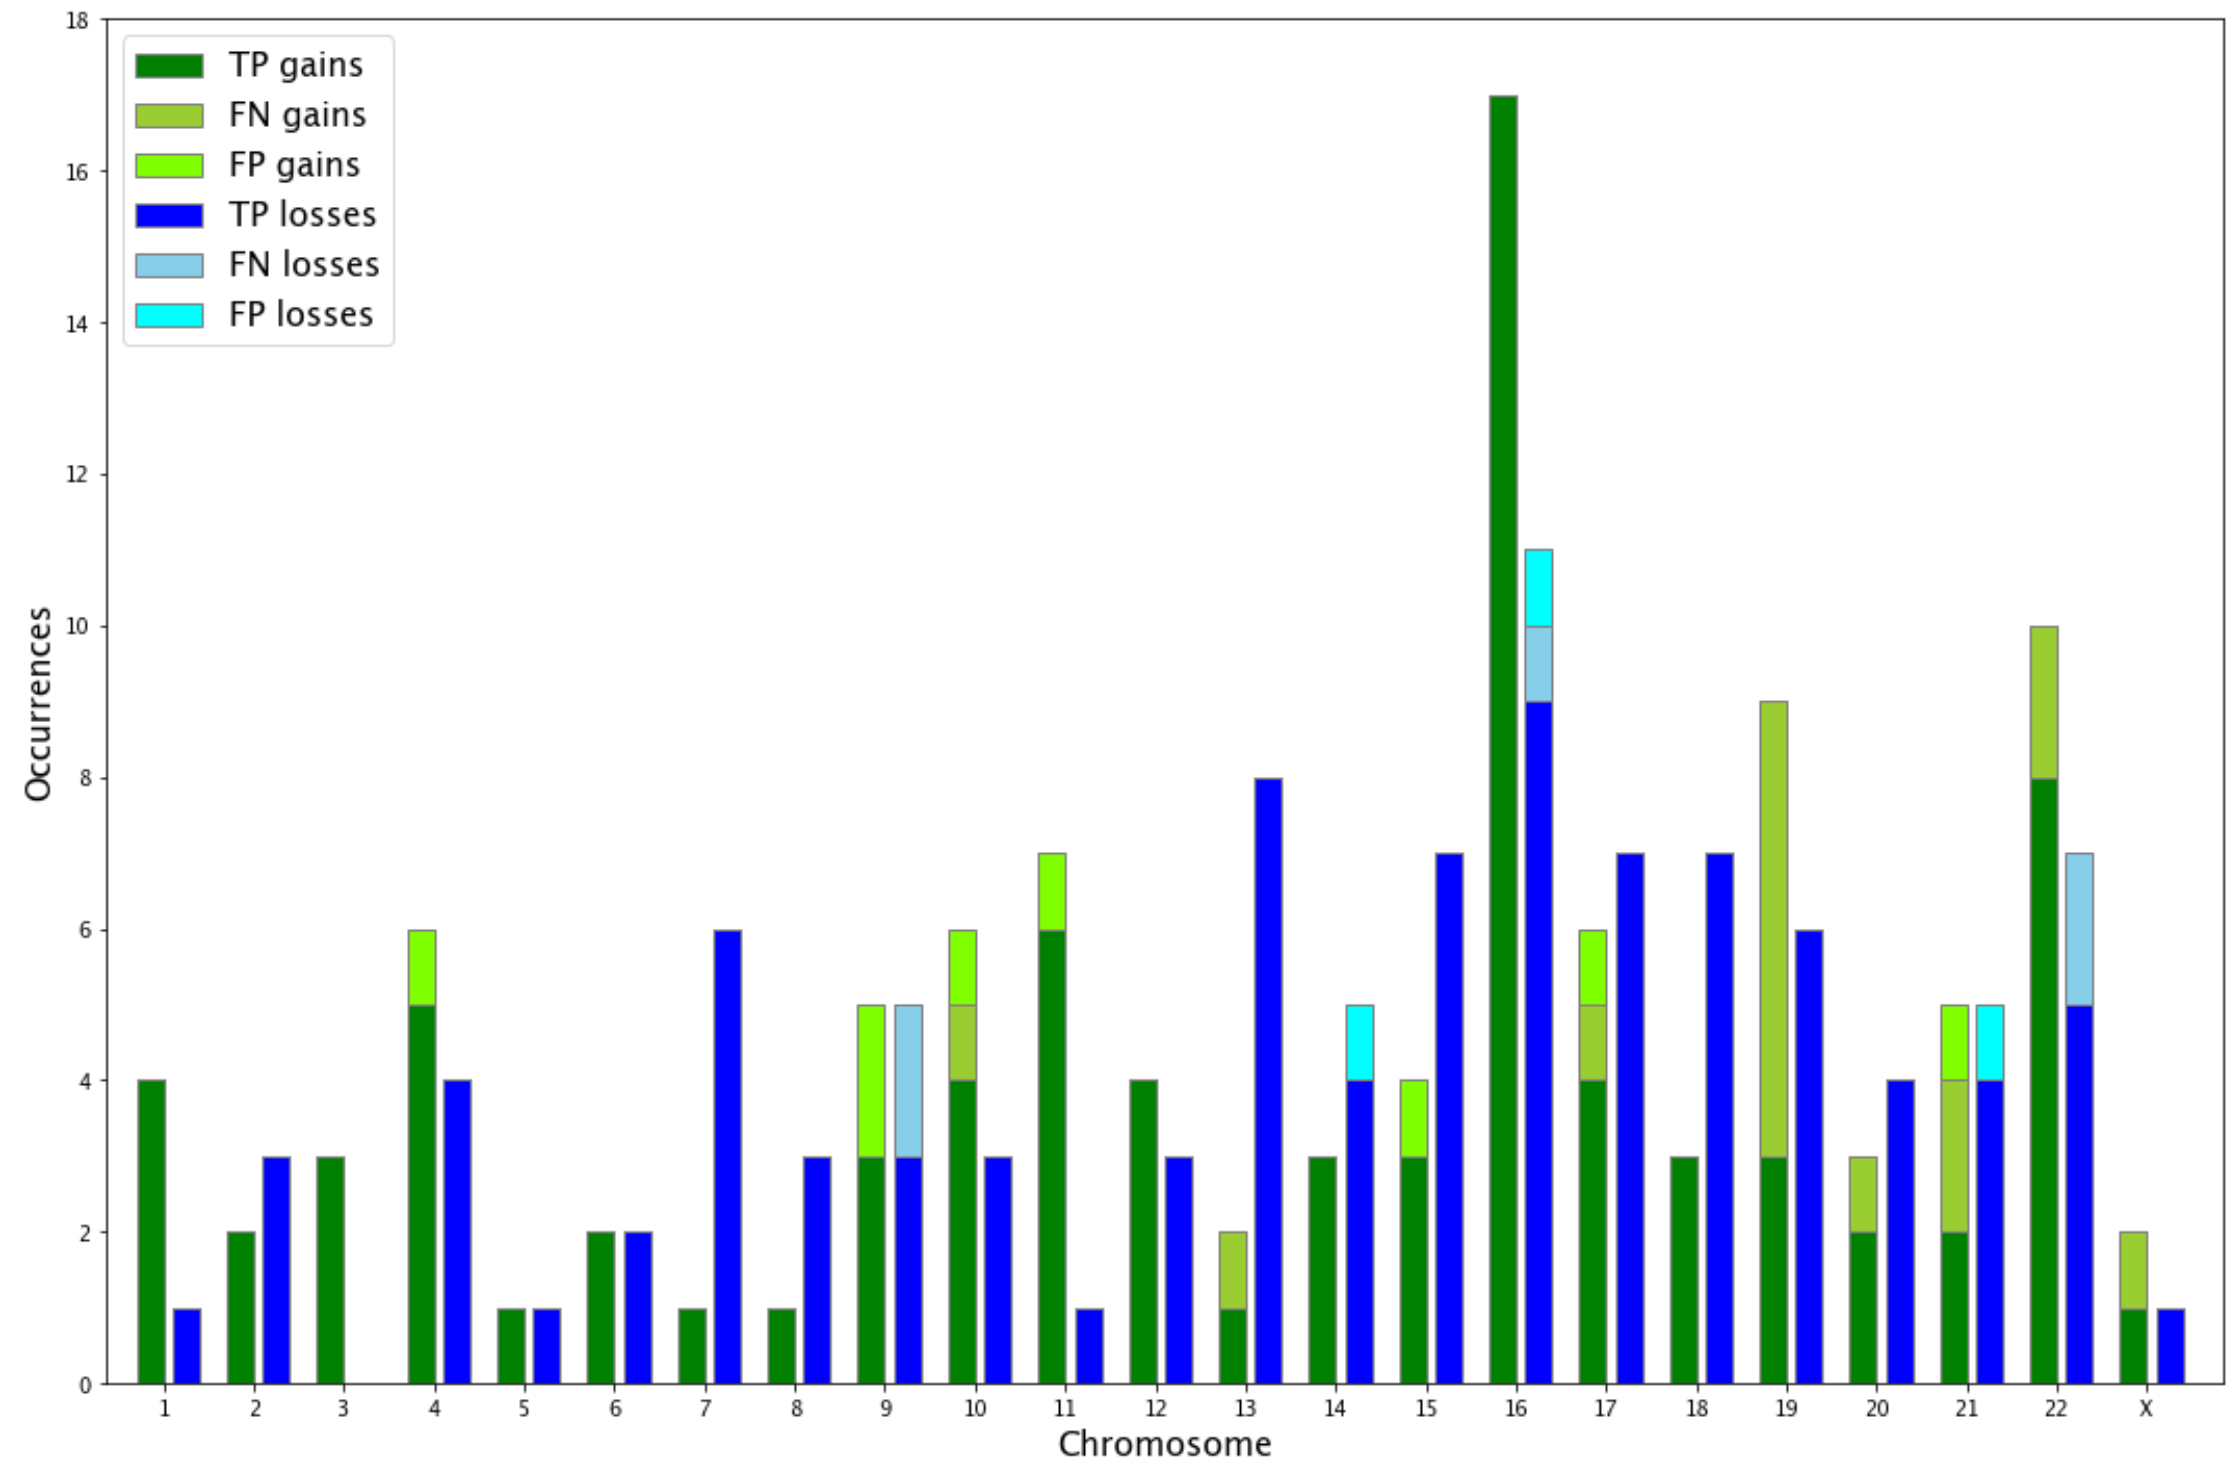

a) euploid

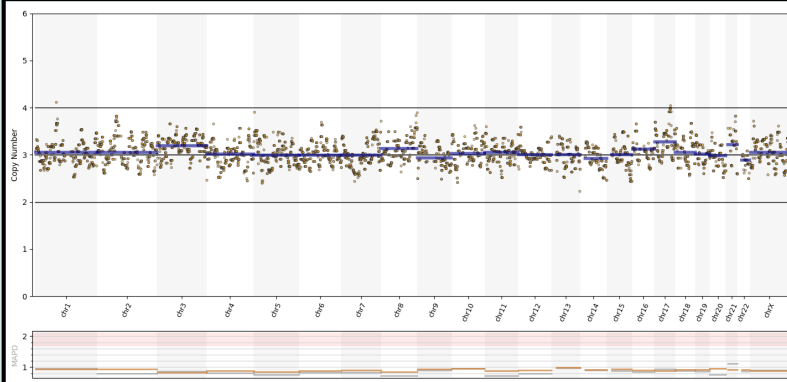

b) aneuploid (+Chr. 22)

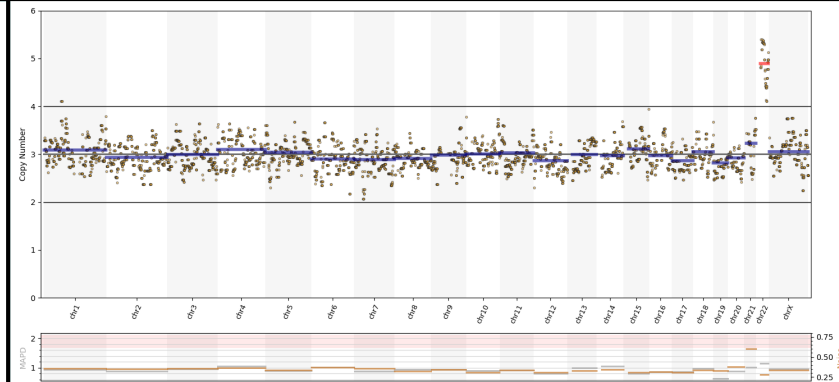

c) aneuploid (+Chr. 11, -Chr. 16)

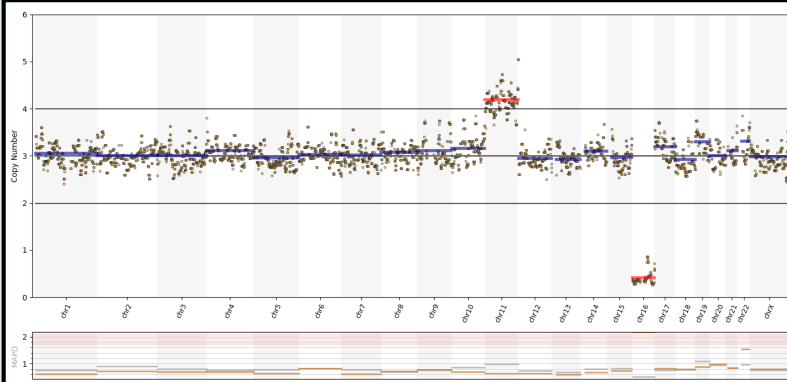

d) aneuploid (+Chr. 10, +Chr. X)

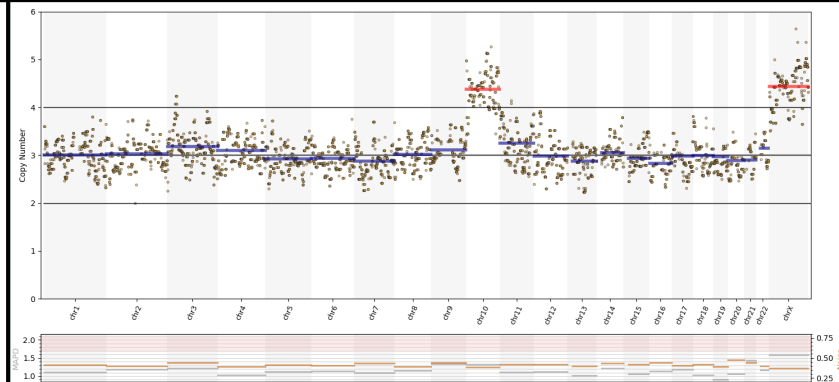

e) aneuploid (-Chr. 2, +Chr. 9, -Chr. 15)

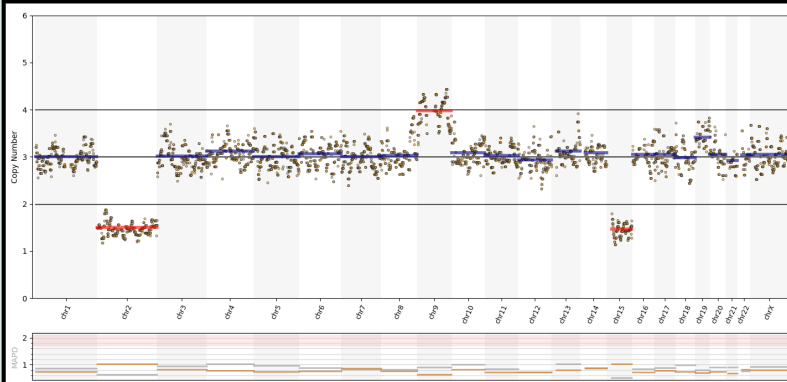

f) aneuploid (multiple)

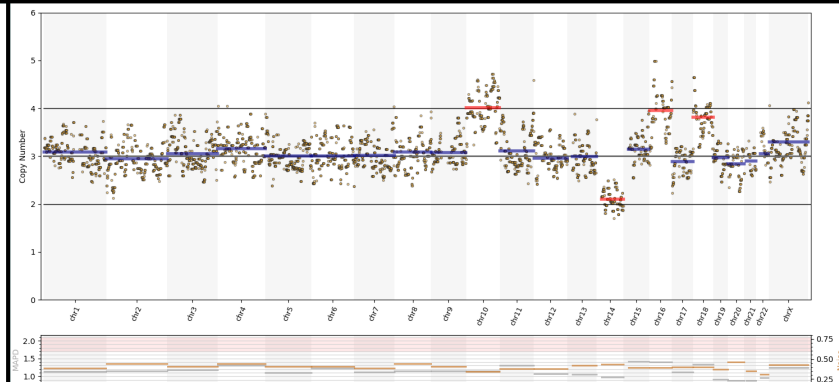

| Sample Number | Ploidy Status |               |             | Chromosome Aberrations |             |             |
|---------------|---------------|---------------|-------------|------------------------|-------------|-------------|
|               | aCGH          | Nanopore      | Concordance | aCGH                   | Nanopore    | Concordance |
| Pb1           | aneuploid     | aneuploid     | CONCORDANT  | multiple               | multiple    | CONCORDANT  |
| Pb2           | aneuploid     | aneuploid     | CONCORDANT  | +22                    | +22         | CONCORDANT  |
| Pb3           | euploid       | euploid       | CONCORDANT  | -                      | -           | CONCORDANT  |
| Pb4           | euploid       | euploid       | CONCORDANT  | -                      | -           | CONCORDANT  |
| Pb5           | aneuploid     | aneuploid     | CONCORDANT  | -1                     | -1          | CONCORDANT  |
| Pb6           | euploid       | euploid       | CONCORDANT  | -                      | -           | CONCORDANT  |
| Pb7           | euploid       | euploid       | CONCORDANT  | -                      | -           | CONCORDANT  |
| Pb8           | euploid       | euploid       | CONCORDANT  | -                      | -           | CONCORDANT  |
| Pb9           | aneuploid     | aneuploid     | CONCORDANT  | multiple               | multiple    | CONCORDANT  |
| Pb10          | euploid       | euploid       | CONCORDANT  | -                      | -           | CONCORDANT  |
| Pb11          | aneuploid     | aneuploid     | CONCORDANT  | -4                     | -4          | CONCORDANT  |
| Pb12          | euploid       | euploid       | CONCORDANT  | -                      | -           | CONCORDANT  |
| Pb13          | aneuploid     | aneuploid     | CONCORDANT  | -15                    | -15         | CONCORDANT  |
| Pb14          | euploid       | euploid       | CONCORDANT  | -                      | -           | CONCORDANT  |
| Pb15          | aneuploid     | aneuploid     | CONCORDANT  | -10,+14                | -10,+14     | CONCORDANT  |
| Pb16          | aneuploid     | aneuploid     | CONCORDANT  | +10,+X                 | +10,+X      | CONCORDANT  |
| Pb17          | aneuploid     | aneuploid     | CONCORDANT  | -14,+20                | -14,+20     | CONCORDANT  |
| Pb18          | aneuploid     | aneuploid     | CONCORDANT  | multiple               | multiple    | CONCORDANT  |
| Pb19          | aneuploid     | aneuploid     | CONCORDANT  | +16,-18,-20            | +16,-18,-20 | CONCORDANT  |
| Pb20          | aneuploid     | aneuploid     | CONCORDANT  | -7,+16                 | multiple    | DISCORDANT  |
| Pb21          | aneuploid     | aneuploid     | CONCORDANT  | +19,-21,-22            | -21         | DISCORDANT  |
| Pb22          | aneuploid     | aneuploid     | CONCORDANT  | +12,-13,-16            | +12,-13,-16 | CONCORDANT  |
| Pb23          | euploid       | euploid       | CONCORDANT  | -                      | -           | CONCORDANT  |
| Pb24          | euploid       | euploid       | CONCORDANT  | -                      | -           | CONCORDANT  |
| Pb25          | euploid       | euploid       | CONCORDANT  | -                      | -           | CONCORDANT  |
| Pb26          | aneuploid     | aneuploid     | CONCORDANT  | -16                    | -16         | CONCORDANT  |
| Pb27          | euploid       | euploid       | CONCORDANT  | -                      | -           | CONCORDANT  |
| Pb28          | aneuploid     | aneuploid     | CONCORDANT  | -6,-12                 | -6,-12      | CONCORDANT  |
| Pb29          | euploid       | euploid       | CONCORDANT  | -                      | -           | CONCORDANT  |
| Pb30          | aneuploid     | aneuploid     | CONCORDANT  | +11,+15,+22            | +11,+15,+22 | CONCORDANT  |
| Pb31          | aneuploid     | aneuploid     | CONCORDANT  | -17                    | -17         | CONCORDANT  |
| Pb32          | aneuploid     | aneuploid     | CONCORDANT  | multiple               | multiple    | CONCORDANT  |
| Pb33          | aneuploid     | aneuploid     | CONCORDANT  | multiple               | multiple    | CONCORDANT  |
| Pb34          | aneuploid     | aneuploid     | CONCORDANT  | -13,-15,-21            | -13,-15,-21 | CONCORDANT  |
| Pb35          | aneuploid     | aneuploid     | CONCORDANT  | -22                    | -22         | CONCORDANT  |
| Pb36          | euploid       | euploid       | CONCORDANT  | -                      | -           | CONCORDANT  |
| Pb37          | aneuploid     | aneuploid     | CONCORDANT  | +16                    | +16         | CONCORDANT  |
| Pb38          | euploid       | euploid       | CONCORDANT  | -                      | -           | CONCORDANT  |
| Pb39          | aneuploid     | aneuploid     | CONCORDANT  | multiple               | multiple    | CONCORDANT  |
| Pb40          | aneuploid     | aneuploid     | CONCORDANT  | +4                     | +4          | CONCORDANT  |
| Pb41          | aneuploid     | aneuploid     | CONCORDANT  | multiple               | multiple    | CONCORDANT  |
| Pb42          | aneuploid     | aneuploid     | CONCORDANT  | multiple               | multiple    | CONCORDANT  |
| Pb43          | aneuploid     | aneuploid     | CONCORDANT  | multiple               | multiple    | CONCORDANT  |
| Pb44          | aneuploid     | aneuploid     | CONCORDANT  | +15                    | +15         | CONCORDANT  |
| Pb45          | aneuploid     | aneuploid     | CONCORDANT  | +16,-19                | +16,-19     | CONCORDANT  |
| Pb46          | aneuploid     | euploid       | DISCORDANT  | +22                    | -           | DISCORDANT  |
| Pb47          | aneuploid     | aneuploid     | CONCORDANT  | multiple               | multiple    | CONCORDANT  |
| Pb48          | euploid       | not evaluable | EXCLUDED    | -                      | -           | EXCLUDED    |
| Pb49          | euploid       | euploid       | CONCORDANT  | -                      | -           | CONCORDANT  |
| Pb50          | euploid       | euploid       | CONCORDANT  | -                      | -           | CONCORDANT  |
| Pb51          | aneuploid     | aneuploid     | CONCORDANT  | multiple               | multiple    | CONCORDANT  |
| Pb52          | euploid       | euploid       | CONCORDANT  | -                      | -           | CONCORDANT  |
| Pb53          | euploid       | euploid       | CONCORDANT  | -                      | -           | CONCORDANT  |
| Pb54          | aneuploid     | aneuploid     | CONCORDANT  | -9,-15                 | -9,-15      | CONCORDANT  |
| Pb55          | aneuploid     | aneuploid     | CONCORDANT  | -17,-18                | -17,-18     | CONCORDANT  |
| Pb56          | aneuploid     | aneuploid     | CONCORDANT  | -16                    | -16         | CONCORDANT  |
| Pb57          | euploid       | euploid       | CONCORDANT  | -                      | -           | CONCORDANT  |
| Pb58          | aneuploid     | aneuploid     | CONCORDANT  | -13,-14,+17            | multiple    | DISCORDANT  |
| Pb59          | aneuploid     | aneuploid     | CONCORDANT  | multiple               | multiple    | CONCORDANT  |
| Pb60          | euploid       | euploid       | CONCORDANT  | -                      | -           | CONCORDANT  |
| Pb61          | not evaluable | euploid       | EXCLUDED    | -                      | -           | EXCLUDED    |
| Pb62          | aneuploid     | euploid       | DISCORDANT  | +19                    | -           | DISCORDANT  |
| Pb63          | aneuploid     | aneuploid     | CONCORDANT  | multiple               | multiple    | CONCORDANT  |
| Pb64          | aneuploid     | aneuploid     | CONCORDANT  | +4                     | +4          | CONCORDANT  |
| Pb65          | aneuploid     | aneuploid     | CONCORDANT  | +16                    | +16         | CONCORDANT  |
| Pb66          | aneuploid     | aneuploid     | CONCORDANT  | multiple               | multiple    | CONCORDANT  |
| Pb67          | aneuploid     | aneuploid     | CONCORDANT  | +12,-15                | +12,-15     | CONCORDANT  |
| Pb68          | aneuploid     | aneuploid     | CONCORDANT  | +2                     | +2          | CONCORDANT  |
| Pb69          | aneuploid     | aneuploid     | CONCORDANT  | +6,-18                 | +6,-18      | CONCORDANT  |
| Pb70          | aneuploid     | aneuploid     | CONCORDANT  | -16,-22                | -16,-22     | CONCORDANT  |
| Pb71          | aneuploid     | aneuploid     | CONCORDANT  | +11,+16,-17            | +11,+16,-17 | CONCORDANT  |
| Pb72          | aneuploid     | aneuploid     | CONCORDANT  | -19                    | -19         | CONCORDANT  |
| Pb73          | aneuploid     | aneuploid     | CONCORDANT  | +4,-20                 | +4,-20      | CONCORDANT  |
| Pb74          | aneuploid     | aneuploid     | CONCORDANT  | -16,+21                | -16,+21     | CONCORDANT  |
| Pb75          | aneuploid     | aneuploid     | CONCORDANT  | +16,+22                | +16,+22     | CONCORDANT  |
| Pb76          | euploid       | euploid       | CONCORDANT  | -                      | -           | CONCORDANT  |
| Pb77          | euploid       | euploid       | CONCORDANT  | -                      | -           | CONCORDANT  |
| Pb78          | aneuploid     | aneuploid     | CONCORDANT  | +17,-22                | +17,-22     | CONCORDANT  |
| Pb79          | aneuploid     | aneuploid     | CONCORDANT  | +18                    | +18         | CONCORDANT  |
| Pb80          | euploid       | euploid       | CONCORDANT  | -                      | -           | CONCORDANT  |
| Pb81          | euploid       | euploid       | CONCORDANT  | -                      | -           | CONCORDANT  |
| Pb82          | aneuploid     | aneuploid     | CONCORDANT  | +9,-13                 | +9,-13      | CONCORDANT  |
| Pb83          | aneuploid     | aneuploid     | CONCORDANT  | +16,-19                | +16,-19     | CONCORDANT  |
| Pb84          | aneuploid     | aneuploid     | CONCORDANT  | +1                     | +1          | CONCORDANT  |
| Pb85          | aneuploid     | euploid       | DISCORDANT  | -16                    | -           | DISCORDANT  |
| Pb86          | aneuploid     | aneuploid     | CONCORDANT  | multiple               | multiple    | CONCORDANT  |
| Pb87          | aneuploid     | aneuploid     | CONCORDANT  | +20                    | +20         | CONCORDANT  |
| Pb88          | aneuploid     | aneuploid     | CONCORDANT  | -17                    | -17         | CONCORDANT  |
| Pb89          | aneuploid     | aneuploid     | CONCORDANT  | +22                    | +22         | CONCORDANT  |
| Pb90          | aneuploid     | aneuploid     | CONCORDANT  | multiple               | multiple    | CONCORDANT  |
| Pb91          | aneuploid     | aneuploid     | CONCORDANT  | -2,+6                  | -2,+6       | CONCORDANT  |
| Pb92          | aneuploid     | aneuploid     | CONCORDANT  | multiple               | multiple    | CONCORDANT  |
| Pb93          | aneuploid     | aneuploid     | CONCORDANT  | +1,-16,+19             | +1,-16      | DISCORDANT  |
| Pb94          | euploid       | euploid       | CONCORDANT  | -                      | -           | CONCORDANT  |
| Pb95          | not evaluable | euploid       | EXCLUDED    | -                      | -           | EXCLUDED    |
| Pb96          | aneuploid     | aneuploid     | CONCORDANT  | +11,-16,+19            | +11,-16     | DISCORDANT  |
| Pb97          | aneuploid     | aneuploid     | CONCORDANT  | +16                    | +16         | CONCORDANT  |
| Pb98          | aneuploid     | aneuploid     | CONCORDANT  | -4                     | -4          | CONCORDANT  |
| Pb99          | aneuploid     | aneuploid     | CONCORDANT  | +16                    | +16         | CONCORDANT  |
| Pb100         | euploid       | euploid       | CONCORDANT  | -                      | -           | CONCORDANT  |
| Pb101         | euploid       | euploid       | CONCORDANT  | -                      | -           | CONCORDANT  |
| Pb102         | euploid       | euploid       | CONCORDANT  | -                      | -           | CONCORDANT  |
