# Supplementary material for: Evaluation of nanopore sequencing on polar bodies for routine pre-implantation genetic testing for aneuploidy
Source: bioRxiv or medRxiv preprint supplement (doi:10.1101/2023.04.17.23288670), 2023-08-18
Supplement: Supplementary file [file media-1.pdf]

Supplementary Data:

Supplementary Figure and Table Legends:

Suppl. Figure 1: Relation of noise and MAPD quality values from all 102 PB samples analyzed with nanopore sequencing. MAPD: Median of the Absolute values of all Pairwise Differences; noise: median standard deviation of normalised read counts within each segment.

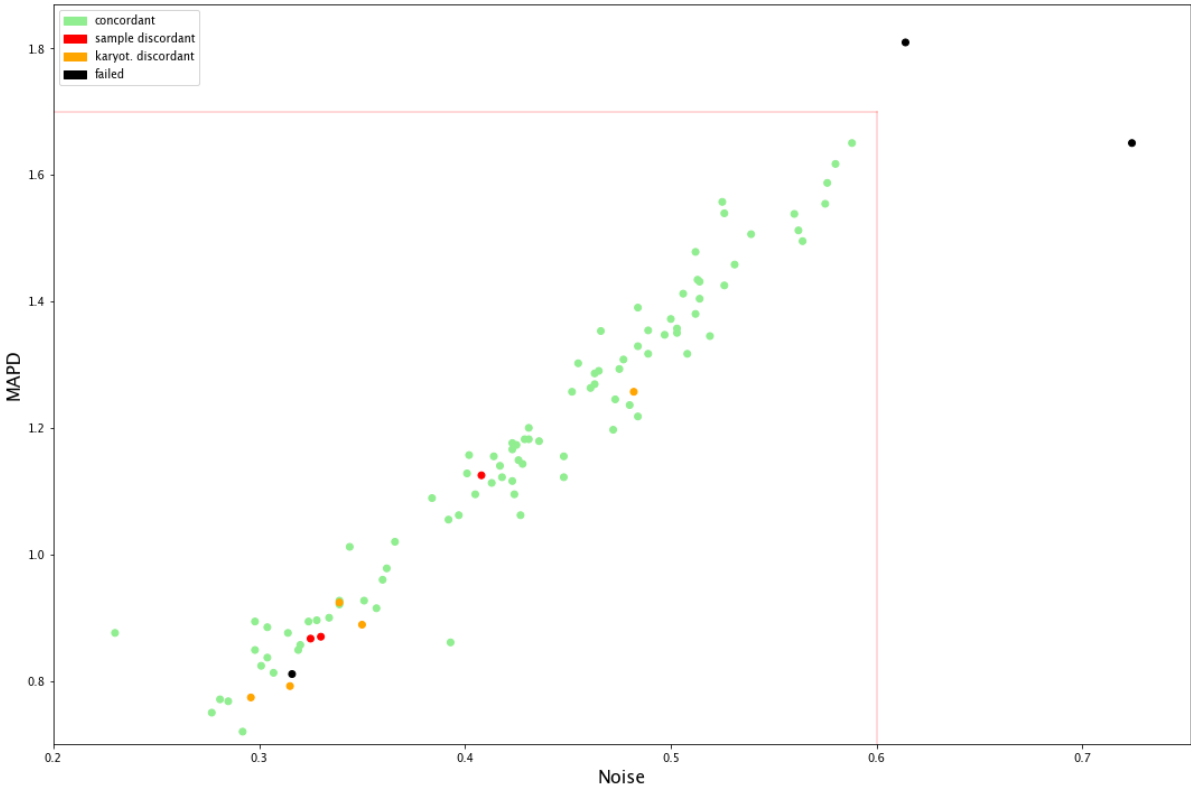

**Suppl. Table 1: Detailed list of Nanopore sequencing results in comparison with aCGH results.** All samples, that were digested with Endonuclease I after WGA are marked as EN.

| Sample Number | Conc. after WGA (ng/μl) | Library Preparation |         | Nanopore Sequencing |                     | Output         |           |       | Ploidy Status |               |               | Chromosome Aberrations |                                                                         |                                                                       | manual evaluation of euploid nanopore results |             |
|---------------|-------------------------|---------------------|---------|---------------------|---------------------|----------------|-----------|-------|---------------|---------------|---------------|------------------------|-------------------------------------------------------------------------|-----------------------------------------------------------------------|-----------------------------------------------|-------------|
|               |                         | Endonuclease digest | Barcode | Run                 | Time / Sample (min) | Yield (Mbases) | Raw Reads | noise | MAPD          | aCGH          | Nanopore      | Concordance            | aCGH                                                                    | Nanopore                                                              |                                               | Concordance |
| Pb1           | 400                     | no                  | 1       | 1                   | 90                  | 130            | 121.912   | 0.360 | 0.960         | aneuploid     | aneuploid     | CONCORDANT             | multiple (+2, -9, -15, -16)                                             | multiple (+2, -9, -15, -16)                                           | CONCORDANT                                    |             |
| Pb2           | 239                     | no                  | 2       | 1                   | 90                  | 133            | 138.932   | 0.339 | 0.921         | aneuploid     | aneuploid     | CONCORDANT             | +22                                                                     | -                                                                     | CONCORDANT                                    |             |
| Pb3           | 283                     | no                  | 3       | 1                   | 90                  | 104            | 94.894    | 0.304 | 0.885         | euploid       | euploid       | CONCORDANT             | -                                                                       | -                                                                     | CONCORDANT                                    | ok          |
| Pb4           | 264                     | no                  | 4       | 1                   | 90                  | 111            | 104.648   | 0.314 | 0.876         | euploid       | euploid       | CONCORDANT             | -                                                                       | -                                                                     | CONCORDANT                                    | ok          |
| Pb5           | 447                     | no                  | 5       | 2                   | 70                  | 115            | 104.473   | 0.392 | 1.053         | aneuploid     | aneuploid     | CONCORDANT             | -1                                                                      | -1                                                                    | CONCORDANT                                    | ok          |
| Pb6           | 347                     | yes                 | 1       | EN4                 | 90                  | 170            | 117.144   | 0.339 | 0.937         | euploid       | euploid       | CONCORDANT             | -                                                                       | -                                                                     | CONCORDANT                                    | ok (+22)    |
| Pb7           | 323                     | no                  | 7       | 2                   | 70                  | 108            | 90.215    | 0.298 | 0.849         | euploid       | euploid       | CONCORDANT             | -                                                                       | -                                                                     | CONCORDANT                                    | ok          |
| Pb8           | 323                     | no                  | 8       | 2                   | 70                  | 154            | 133.237   | 0.351 | 0.927         | euploid       | euploid       | CONCORDANT             | -                                                                       | -                                                                     | CONCORDANT                                    | ok (+20)    |
| Pb9           | 309                     | no                  | 9       | 2                   | 70                  | 62             | 50.466    | 0.452 | 1.257         | aneuploid     | aneuploid     | CONCORDANT             | multiple (+7, +10, +20, +21, -22)                                       | multiple (+7, +10, +21, -22)                                          | CONCORDANT                                    |             |
| Pb10          | 303                     | yes                 | 1       | EN2                 | 100                 | 178            | 189.572   | 0.324 | 0.894         | euploid       | euploid       | CONCORDANT             | -                                                                       | -                                                                     | CONCORDANT                                    | ok          |
| Pb11          | 307                     | no                  | 11      | 3                   | 90                  | 84             | 67.208    | 0.423 | 1.176         | aneuploid     | aneuploid     | CONCORDANT             | -4                                                                      | -4                                                                    | CONCORDANT                                    | ok          |
| Pb12          | 307                     | yes                 | 2       | EN2                 | 100                 | 245            | 274.533   | 0.281 | 0.771         | euploid       | euploid       | CONCORDANT             | -                                                                       | -                                                                     | CONCORDANT                                    | ok          |
| Pb13          | 302                     | no                  | 3       | 3                   | 90                  | 64             | 48.057    | 0.466 | 1.353         | aneuploid     | aneuploid     | CONCORDANT             | -15                                                                     | -15                                                                   | CONCORDANT                                    | ok          |
| Pb14          | 299                     | yes                 | 7       | EN3                 | 100                 | 144            | 190.505   | 0.328 | 0.896         | euploid       | euploid       | CONCORDANT             | -                                                                       | -                                                                     | CONCORDANT                                    | ok          |
| Pb15          | 440                     | no                  | 5       | 4                   | 90                  | 100            | 72.449    | 0.423 | 1.166         | aneuploid     | aneuploid     | CONCORDANT             | -10, +14                                                                | -10, +14                                                              | CONCORDANT                                    |             |
| Pb16          | 460                     | no                  | 6       | 4                   | 90                  | 104            | 75.678    | 0.415 | 1.155         | aneuploid     | aneuploid     | CONCORDANT             | +10, +X                                                                 | +10, +X                                                               | CONCORDANT                                    |             |
| Pb17          | 460                     | no                  | 7       | 4                   | 90                  | 64             | 53.288    | 0.473 | 1.245         | aneuploid     | aneuploid     | CONCORDANT             | -14, +20                                                                | -14, +20                                                              | CONCORDANT                                    |             |
| Pb18          | 387                     | yes                 | 3       | EN2                 | 100                 | 142            | 172.952   | 0.344 | 1.022         | aneuploid     | aneuploid     | CONCORDANT             | multiple (+1, +4, -5, +17, -21, +22)                                    | multiple (+1, +4, -5, +17, -21, +22)                                  | CONCORDANT                                    |             |
| Pb19          | 400                     | no                  | 9       | 4                   | 90                  | 60             | 46.297    | 0.514 | 1.404         | aneuploid     | aneuploid     | CONCORDANT             | +16, -18, -20                                                           | +16, -18, -20                                                         | CONCORDANT                                    |             |
| Pb20          | 453                     | yes                 | 8       | EN3                 | 100                 | 176            | 233.128   | 0.482 | 1.257         | aneuploid     | aneuploid     | CONCORDANT             | -7, +16                                                                 | multiple (-7, +9, +10, +16, +17)                                      | DISCORDANT                                    |             |
| Pb21          | 281                     | yes                 | 9       | EN3                 | 100                 | 148            | 197.323   | 0.339 | 0.924         | aneuploid     | aneuploid     | CONCORDANT             | +19, -21, -22                                                           | -21                                                                   | DISCORDANT                                    |             |
| Pb22          | 340                     | no                  | 2       | 5                   | 120                 | 112            | 97.165    | 0.425 | 1.173         | aneuploid     | aneuploid     | CONCORDANT             | +12, -13, -16                                                           | -                                                                     | CONCORDANT                                    |             |
| Pb23          | 353                     | no                  | 3       | 5                   | 120                 | 99             | 82.572    | 0.405 | 1.095         | euploid       | euploid       | CONCORDANT             | -                                                                       | -                                                                     | CONCORDANT                                    | ok          |
| Pb24          | 300                     | no                  | 4       | 5                   | 120                 | 112            | 92.960    | 0.426 | 1.149         | euploid       | euploid       | CONCORDANT             | -                                                                       | -                                                                     | CONCORDANT                                    | ok          |
| Pb25          | 258                     | yes                 | 1       | EN1                 | 120                 | 211            | 231.486   | 0.319 | 0.849         | euploid       | euploid       | CONCORDANT             | -                                                                       | -                                                                     | CONCORDANT                                    | ok          |
| Pb26          | 223                     | yes                 | 2       | EN1                 | 120                 | 281            | 361.988   | 0.277 | 0.750         | aneuploid     | aneuploid     | CONCORDANT             | -16                                                                     | -16                                                                   | CONCORDANT                                    | ok          |
| Pb27          | 295                     | yes                 | 3       | EN1                 | 120                 | 227            | 268.410   | 0.285 | 0.768         | euploid       | euploid       | CONCORDANT             | -                                                                       | -                                                                     | CONCORDANT                                    | ok          |
| Pb28          | 325                     | yes                 | 4       | EN1                 | 120                 | 253            | 311.201   | 0.292 | 0.720         | aneuploid     | aneuploid     | CONCORDANT             | -6, -12                                                                 | -6, -12                                                               | CONCORDANT                                    |             |
| Pb29          | 309                     | yes                 | 4       | EN5                 | 90                  | 183            | 222.899   | 0.307 | 0.813         | euploid       | euploid       | CONCORDANT             | -                                                                       | -                                                                     | CONCORDANT                                    | ok          |
| Pb30          | 331                     | yes                 | 10      | EN3                 | 100                 | 155            | 220.552   | 0.230 | 0.876         | aneuploid     | aneuploid     | CONCORDANT             | +11, +15, +22                                                           | +11, +15, +22                                                         | CONCORDANT                                    |             |
| Pb31          | 333                     | no                  | 1       | 7                   | 70                  | 106            | 75.428    | 0.384 | 1.089         | aneuploid     | aneuploid     | CONCORDANT             | -17                                                                     | -17                                                                   | CONCORDANT                                    |             |
| Pb32          | 413                     | yes                 | 4       | EN2                 | 100                 | 189            | 218.267   | 0.298 | 0.894         | aneuploid     | aneuploid     | CONCORDANT             | multiple (+3, +11, +12, +16, +19)                                       | multiple (+3, +4, +11, +12, +16, +19)                                 | CONCORDANT                                    |             |
| Pb33          | 413                     | yes                 | 11      | EN3                 | 100                 | 174            | 243.733   | 0.320 | 0.857         | aneuploid     | aneuploid     | CONCORDANT             | multiple (+2, +9, -15, +19)                                             | multiple (+2, +9, -15, +19)                                           | CONCORDANT                                    |             |
| Pb34          | 367                     | yes                 | 12      | EN3                 | 100                 | 132            | 208.681   | 0.301 | 0.824         | aneuploid     | aneuploid     | CONCORDANT             | -13, -15, -21                                                           | -13, -15, -21                                                         | CONCORDANT                                    |             |
| Pb35          | 331                     | no                  | 5       | 7                   | 70                  | 128            | 91.228    | 0.362 | 0.978         | aneuploid     | aneuploid     | CONCORDANT             | -22                                                                     | -22                                                                   | CONCORDANT                                    |             |
| Pb36          | 360                     | no                  | 6       | 8                   | 70                  | 108            | 83.115    | 0.366 | 1.020         | euploid       | euploid       | CONCORDANT             | -                                                                       | -                                                                     | CONCORDANT                                    | ok (+19)    |
| Pb37          | 333                     | no                  | 7       | 8                   | 70                  | 94             | 69.548    | 0.489 | 1.317         | aneuploid     | aneuploid     | CONCORDANT             | +16                                                                     | +16                                                                   | CONCORDANT                                    |             |
| Pb38          | 300                     | yes                 | 8       | EN5                 | 90                  | 190            | 246.494   | 0.448 | 1.122         | euploid       | euploid       | CONCORDANT             | -                                                                       | -                                                                     | CONCORDANT                                    | ok (+22)    |
| Pb39          | 347                     | no                  | 9       | 8                   | 70                  | 71             | 54.614    | 0.428 | 1.143         | aneuploid     | aneuploid     | CONCORDANT             | multiple (-7, +16, -18, -22)                                            | multiple (-7, +16, -18, -22)                                          | CONCORDANT                                    |             |
| Pb40          | 373                     | no                  | 10      | 8                   | 70                  | 81             | 58.109    | 0.417 | 1.140         | aneuploid     | aneuploid     | CONCORDANT             | +4                                                                      | +4                                                                    | CONCORDANT                                    |             |
| Pb41          | 297                     | no                  | 11      | 8                   | 70                  | 92             | 68.813    | 0.393 | 0.861         | aneuploid     | aneuploid     | CONCORDANT             | multiple (+3, -6, -7, -8, -9, -10, -12, +13, +14, -17, -18, -19, -21)   | multiple (+3, -6, -7, -8, -9, -10, -12, +13, +14, -17, -18, -19, -21) | CONCORDANT                                    |             |
| Pb42          | 353                     | no                  | 1       | 9                   | 90                  | 95             | 65.990    | 0.513 | 1.434         | aneuploid     | aneuploid     | CONCORDANT             | multiple (+1, +4, +8, +10, +11, +12, +13, +14, -15, +16, +18, +21, +22) | multiple (+1, +4, +8, +10, +11, +12, +14, -15, +16, +18, +21, +22)    | CONCORDANT                                    |             |
| Pb43          | 353                     | no                  | 2       | 9                   | 90                  | 90             | 59.374    | 0.424 | 1.095         | aneuploid     | aneuploid     | CONCORDANT             | multiple (-4, -7, -8, -10, -12, -13, -17, +19, -20, -21, +22, +X)       | multiple (-4, -7, -8, -10, -12, -13, -16, -17, -20, -21)              | CONCORDANT                                    |             |
| Pb44          | 433                     | no                  | 3       | 9                   | 90                  | 73             | 51.420    | 0.455 | 1.302         | aneuploid     | aneuploid     | CONCORDANT             | +15                                                                     | +15                                                                   | CONCORDANT                                    |             |
| Pb45          | 347                     | no                  | 4       | 9                   | 90                  | 102            | 68.937    | 0.401 | 1.128         | aneuploid     | aneuploid     | CONCORDANT             | +16, -19                                                                | +16, -19                                                              | CONCORDANT                                    |             |
| Pb46          | 347                     | no                  | 5       | 9                   | 90                  | 100            | 70.807    | 0.408 | 1.125         | aneuploid     | aneuploid     | DISCORDANT             | +22                                                                     | -                                                                     | DISCORDANT                                    | ok (+22)    |
| Pb47          | 380                     | no                  | 6       | 9                   | 90                  | 90             | 70.894    | 0.402 | 1.157         | aneuploid     | aneuploid     | CONCORDANT             | multiple (+10, -14, +16, +18)                                           | multiple (+10, -14, +16, +18)                                         | CONCORDANT                                    |             |
| Pb48          | 323                     | no                  | 7       | 10                  | 80                  | 35             | 22.063    | 0.614 | 1.890         | euploid       | not evaluable | EXCLUDED               | -                                                                       | -                                                                     | EXCLUDED                                      |             |
| Pb49          | 330                     | no                  | 8       | 10                  | 80                  | 47             | 31.641    | 0.512 | 1.380         | euploid       | euploid       | CONCORDANT             | -                                                                       | -                                                                     | CONCORDANT                                    | ok          |
| Pb50          | 360                     | no                  | 9       | 10                  | 80                  | 45             | 33.090    | 0.580 | 1.617         | euploid       | euploid       | CONCORDANT             | -                                                                       | -                                                                     | CONCORDANT                                    | ok          |
| Pb51          | 329                     | no                  | 10      | 10                  | 80                  | 46             | 32.845    | 0.531 | 1.458         | aneuploid     | aneuploid     | CONCORDANT             | multiple (-7, -9, +16, -19)                                             | multiple (-7, -9, +16, -19)                                           | CONCORDANT                                    |             |
| Pb52          | 321                     | no                  | 11      | 10                  | 80                  | 52             | 37.722    | 0.480 | 1.236         | euploid       | euploid       | CONCORDANT             | -                                                                       | -                                                                     | CONCORDANT                                    | ok          |
| Pb53          | 380                     | no                  | 12      | 10                  | 80                  | 58             | 43.439    | 0.576 | 1.587         | euploid       | euploid       | CONCORDANT             | -                                                                       | -                                                                     | CONCORDANT                                    | ok          |
| Pb54          | 302                     | no                  | 1       | 11                  | 80                  | 54             | 45.582    | 0.477 | 1.308         | aneuploid     | aneuploid     | CONCORDANT             | -9, -15                                                                 | -9, -15                                                               | CONCORDANT                                    |             |
| Pb55          | 413                     | no                  | 2       | 11                  | 80                  | 51             | 39.452    | 0.484 | 1.329         | aneuploid     | aneuploid     | CONCORDANT             | -17, -18                                                                | -17, -18                                                              | CONCORDANT                                    |             |
| Pb56          | 367                     | no                  | 3       | 11                  | 80                  | 51             | 42.753    | 0.526 | 1.425         | aneuploid     | aneuploid     | CONCORDANT             | -16                                                                     | -16                                                                   | CONCORDANT                                    |             |
| Pb57          | 380                     | no                  | 4       | 11                  | 80                  | 62             | 48.039    | 0.463 | 1.269         | euploid       | euploid       | CONCORDANT             | -                                                                       | -                                                                     | CONCORDANT                                    | ok (+16)    |
| Pb58          | 353                     | yes                 | 2       | EN4                 | 90                  | 152            | 96.024    | 0.350 | 0.889         | aneuploid     | aneuploid     | CONCORDANT             | -13, -14, +17                                                           | multiple (+11, -13, -14, +15, +17, +21)                               | DISCORDANT                                    |             |
| Pb59          | 360                     | no                  | 6       | 11                  | 80                  | 40             | 30.948    | 0.526 | 1.539         | aneuploid     | aneuploid     | CONCORDANT             | multiple (+3, +9, -13, +17, -18, -X)                                    | multiple (+3, +9, -13, +17, -18, -X)                                  | CONCORDANT                                    |             |
| Pb60          | 311                     | no                  | 12      | 12                  | 77                  | 130            | 35.414    | 0.512 | 1.478         | euploid       | euploid       | CONCORDANT             | -                                                                       | -                                                                     | CONCORDANT                                    | ok          |
| Pb61          | 228                     | no                  | 1       | 12                  | 77                  | 180            | 50.758    | 0.724 | 1.650         | not evaluable | euploid       | EXCLUDED               | -                                                                       | -                                                                     | EXCLUDED                                      |             |
| Pb62          | 340                     | yes                 | 9       | EN5                 | 90                  | 270            | 171.404   | 0.325 | 0.867         | aneuploid     | aneuploid     | DISCORDANT             | +19                                                                     | -                                                                     | DISCORDANT                                    | ok (+19)    |
| Pb63          | 373                     | no                  | 3       | 12                  | 77                  | 180            | 74.607    | 0.508 | 1.317         | aneuploid     | aneuploid     | CONCORDANT             | multiple (+5, -11, +15, +17, +19)                                       | multiple (+5, -11, +15, +17(s), +19)                                  | CONCORDANT                                    |             |
| Pb64          | 319                     | no                  | 4       | 12                  | 77                  | 230            | 57.518    | 0.413 | 1.113         | aneuploid     | aneuploid     | CONCORDANT             | +4                                                                      | +4                                                                    | CONCORDANT                                    |             |
| Pb65          | 387                     | no                  | 5       | 12                  | 77                  | 180            | 47.973    | 0.461 | 1.263         | aneuploid     | aneuploid     | CONCORDANT             | +16                                                                     | +16                                                                   | CONCORDANT                                    |             |
| Pb66          | 254                     | no                  | 6       | 12                  | 77                  | 200            | 56.133    | 0.506 | 1.412         | aneuploid     | aneuploid     | CONCORDANT             | multiple (-9, +10, +11, -13, -16, -18, -20, +21, +22)                   | multiple (+11, -13, -16, -18, -20, +22)                               | CONCORDANT                                    |             |
| Pb67          | 371                     | no                  | 1       | 13                  | 80                  | 56             | 35.184    | 0.500 | 1.372         | aneuploid     | aneuploid     | CONCORDANT             | +12, -15                                                                | +12, -15                                                              | CONCORDANT                                    |             |
| Pb68          | 301                     | no                  | 2       | 13                  | 80                  | 77             | 47.042    | 0.431 | 1.200         | aneuploid     | aneuploid     | CONCORDANT             | +2                                                                      | +2                                                                    | CONCORDANT                                    |             |
| Pb69          | 356                     | no                  | 3       | 13                  | 80                  | 50             | 30.943    | 0.560 | 1.538         | aneuploid     | aneuploid     | CONCORDANT             | +6, -18                                                                 | +6, -18                                                               | CONCORDANT                                    |             |
| Pb70          | 294                     | no                  | 4       | 13                  | 80                  | 71             | 46.296    | 0.431 | 1.182         | aneuploid     | aneuploid     | CONCORDANT             | -16, -22                                                                | -16, -22                                                              | CONCORDANT                                    |             |
| Pb71          | 353                     | no                  | 5       | 13                  | 80                  | 63             | 43.959    | 0.465 | 1.290         | aneuploid     | aneuploid     | CONCORDANT             | +11, +16, -17                                                           | +11, +16, -17                                                         | CONCORDANT                                    |             |
| Pb72          | 445                     | no                  | 6       | 13                  | 80                  | 75             | 53.594    | 0.484 | 1.218         | aneuploid     | aneuploid     | CONCORDANT             | -19                                                                     | -19                                                                   | CONCORDANT                                    |             |
| Pb73          | 510                     | no                  | 7       | 14                  | 90                  | 53             | 33.809    | 0.484 | 1.390         | aneuploid     | aneuploid     | CONCORDANT             | +4, -20                                                                 | +4, -20                                                               | CONCORDANT                                    |             |
| Pb74          | 474                     | yes                 | 10      | EN5                 | 90                  | 149</          |           |       |               |               |               |                        |                                                                         |                                                                       |                                               |             |

**Suppl. Table 2: Calculation of time and cost of Nanopore sequencing workflow for polar body PGT-A.**

| <b>Step</b>                                                                                                     | <b>Material</b>                                                                                             | <b>Cost/sample for 1 sample</b> | <b>Cost/sample for 12 samples</b> | <b>Time for 1 sample</b> | <b>Time for 12 samples</b> |
|-----------------------------------------------------------------------------------------------------------------|-------------------------------------------------------------------------------------------------------------|---------------------------------|-----------------------------------|--------------------------|----------------------------|
| <b>WGA</b>                                                                                                      | PicoPlex WGA Kit                                                                                            | 48 €                            | 26 €                              | 2,5 h                    | 2,5 h                      |
|                                                                                                                 | OR:                                                                                                         | OR                              | OR                                | OR                       | OR                         |
| in our study:                                                                                                   | <u>REPLlg Single Cell Kit</u><br>incl. Endonuclease I digest                                                | <u>54 €</u>                     | <u>30 €</u>                       | <u>2.5 h</u>             | <u>3.5 h</u>               |
|                                                                                                                 | OR:                                                                                                         | OR                              | OR                                | OR                       | OR                         |
|                                                                                                                 | REPLlg Ultra Fast Mini Kit<br>Incl. Endonuclease I digest                                                   | 26 €                            | 14 €                              | 1,5 h                    | 2,5 h                      |
| CAVE: One negative control is included in each WGA run to detect contamination and will not be handled further. |                                                                                                             |                                 |                                   |                          |                            |
| <b>Library Prep</b>                                                                                             | details see Suppl. Table 3                                                                                  | 70€                             | 45€                               | 1 h                      | 2 x 5 h                    |
| <b>Sequencing</b><br>(and Basecalling)                                                                          | Flow Cell ( <b>min. 48 Flow cells/year</b> )<br>→ calculated if flow cell is re-used 5x for one sample each | 95€                             | 40€                               | 30 min                   | 2 x 6 h                    |
| <b>Data analysis</b>                                                                                            | PC/NAS/Server                                                                                               |                                 |                                   | 5 min                    | 30-60 min                  |
| <b>TOTAL (dependent on WGA Kit)</b>                                                                             |                                                                                                             | <b>190€ - 220€</b>              | <b>100€ - 120€</b>                | <b>3 h – 5 h</b>         | <b>14 h – 16 h</b>         |

**Suppl. Table 3: Detailed list of costs for consumable material for nanopore sequencing workflow.** All prices were obtained in December 2022 from the respective supplier websites with Austrian-based settings.

**WGA:**

- PicoPlex WGA Kit (Takara #R30050, 50 rx) 1188€ 23,76€/sample

**OR:**

- REPLI-g Ultra Fast Mini Kit (QIAGEN #150035, 100 rx) 901€ 9€/sample
- OR: REPLI-g Single Cell Kit (QIAGEN #150345, 96rx) 2202€ 23€/sample
- NEB T7 Endonuclease I (NEB, #M0302L) 293€ 4,20€/sample

**Library Prep:**

- NEBNext Ultra II End Prep/dA Tailing Module (NEB #E7546L, 96rx) 835€ 8,70€/sample
- NEBNext FFPE DNA Repair Mix (NEB, #M6630L, 96rx) 604€ 6,30€/sample
- gDNA Clean & Concentrator-25 (Zymo #D4065, 100rx) 329€ 3,29€/ sample
- 2x DNA Clean & Concentrator-5 (Zymo #D4004, 200rx) 299€ 2,99€/ sample
- Elution Buffer (QIAGEN, #19086, 250 ml) 35€ 0,50€/ sample
- Blunt/TA Ligase Master Mix (NEB #M0367, 50rx) 370€ 7,40€/ sample
- Quick T4 DNA Ligase (NEB #M2200L, 15 Libraries) 396€ 26€/library
- Native barcoding kit (ONT, EXP-NBD104, 12 BC) 259€ 3,60€/ sample
- Ligation Sequencing Expansions (instead of SQK-LSK109) (ONT, SFB001, AUX001, AMII001, each 12rx) 359€ ca. 4€/ sample
- Flow Cell Priming Kit (ONT, EXP-FLP002) 35€ ca. 1€/ sample
- Flow Cell Wash Kit (ONT, WSH004) 90€ ca. 2€/ sample

**Quality control:**

- Agarose E-Gel 2% (Thermo, #A42135, 10 Gels) 120€ 1,50€/ sample
- 3x Qubit BR Assay (Thermo, #Q32853, 500rx) 327€ 2€/ sample

**For one sample: 70€ / sample**

**For 12 samples: 45 € / sample**

**Suppl. Table 4: Outcome measures of nanopore sequencing samples with and without Endonuclease I digestion step.**

| Sample        | Run        |         | Time / Sample (min) |         | Yield [Mb] |         | Raw Reads  |         | noise      |         | MAPD       |         | Ploidy Status |           |                  |                        |                     | Chromosome aberrations |             |                  |                        |                     |
|---------------|------------|---------|---------------------|---------|------------|---------|------------|---------|------------|---------|------------|---------|---------------|-----------|------------------|------------------------|---------------------|------------------------|-------------|------------------|------------------------|---------------------|
| Sample Number | Without EN | With EN | Without EN          | With EN | Without EN | With EN | Without EN | With EN | Without EN | With EN | Without EN | With EN | aCGH          | Nanopore  | Nanopore with EN | Concordance without EN | Concordance with EN | aCGH                   | Nanopore    | Nanopore with EN | Concordance without EN | Concordance with EN |
| Pb25          | 6          | EN1     | 96                  | 120     | 102        | 211     | 77.207     | 231.486 | 0,369      | 0,319   | 0,963      | 0,849   | euploid       | euploid   | euploid          | CONCORDANT             | CONCORDANT          | -                      | -           | -                | CONCORDANT             | CONCORDANT          |
| Pb26          | 6          | EN1     | 96                  | 120     | 118        | 281     | 87.497     | 361.988 | 0,378      | 0,277   | 1,033      | 0,75    | aneuploid     | aneuploid | aneuploid        | CONCORDANT             | CONCORDANT          | -16                    | -16         | -16              | CONCORDANT             | CONCORDANT          |
| Pb27          | 6          | EN1     | 96                  | 120     | 101        | 227     | 71.566     | 268.420 | 0,402      | 0,285   | 1,152      | 0,768   | euploid       | euploid   | euploid          | CONCORDANT             | CONCORDANT          | -                      | -           | -                | CONCORDANT             | CONCORDANT          |
| Pb28          | 6          | EN1     | 96                  | 120     | 109        | 253     | 86.791     | 311.201 | 0,395      | 0,292   | 1,047      | 0,72    | aneuploid     | aneuploid | aneuploid        | CONCORDANT             | CONCORDANT          | -6, -12                | -6, -12     | -6, -12          | CONCORDANT             | CONCORDANT          |
| Pb10          | 3          | EN2     | 70                  | 100     | 67         | 178     | 59.844     | 189.572 | 0,431      | 0,324   | 1,201      | 0,894   | euploid       | euploid   | euploid          | CONCORDANT             | CONCORDANT          | -                      | -           | -                | CONCORDANT             | CONCORDANT          |
| Pb12          | 3          | EN2     | 90                  | 100     | 58         | 245     | 46.745     | 274.533 | 0,394      | 0,281   | 1,149      | 0,771   | euploid       | euploid   | euploid          | CONCORDANT             | CONCORDANT          | -                      | -           | -                | CONCORDANT             | CONCORDANT          |
| Pb18          | 4          | EN2     | 90                  | 100     | 195        | 142     | 164.091    | 172.952 | 0,351      | 0,344   | 0,950      | 1,012   | aneuploid     | aneuploid | aneuploid        | CONCORDANT             | CONCORDANT          | multiple               | multiple    | multiple         | CONCORDANT             | CONCORDANT          |
| Pb32          | 7          | EN2     | 70                  | 100     | 109        | 189     | 83.677     | 218.267 | 0,397      | 0,298   | 1,134      | 0,894   | aneuploid     | aneuploid | aneuploid        | CONCORDANT             | CONCORDANT          | multiple               | multiple    | multiple         | CONCORDANT             | CONCORDANT          |
| Pb86          | 16         | EN2     | 100                 | 100     | 101        | 261     | 67.671     | 330.514 | 0,500      | 0,427   | 1,244      | 1,062   | aneuploid     | aneuploid | aneuploid        | CONCORDANT             | CONCORDANT          | multiple               | multiple    | multiple         | CONCORDANT             | CONCORDANT          |
| Pb87          | 16         | EN2     | 100                 | 100     | 49         | 158     | 34.733     | 185.739 | 0,516      | 0,334   | 1,479      | 0,900   | aneuploid     | aneuploid | aneuploid        | CONCORDANT             | CONCORDANT          | +20                    | +20         | +20              | CONCORDANT             | CONCORDANT          |
| Pb14          | 3          | EN3     | 90                  | 100     | 68         | 144     | 54.967     | 190.505 | 0,449      | 0,328   | 1,272      | 0,896   | euploid       | euploid   | euploid          | CONCORDANT             | CONCORDANT          | -                      | -           | -                | CONCORDANT             | CONCORDANT          |
| Pb20          | 4          | EN3     | 90                  | 100     | 105        | 176     | 92.290     | 233.128 | 0,537      | 0,482   | 1,389      | 1,257   | aneuploid     | aneuploid | aneuploid        | CONCORDANT             | CONCORDANT          | -7, +16                | multiple    | multiple         | DISCORDANT             | DISCORDANT          |
| Pb21          | 5          | EN3     | 120                 | 100     | 92         | 148     | 74.701     | 197.323 | 0,388      | 0,339   | 1,074      | 0,924   | aneuploid     | aneuploid | aneuploid        | CONCORDANT             | CONCORDANT          | +19, -21, -22          | -21         | -21              | DISCORDANT             | DISCORDANT          |
| Pb30          | 7          | EN3     | 70                  | 100     | 96         | 155     | 69.559     | 220.552 | 0,390      | 0,320   | 1,104      | 0,876   | aneuploid     | aneuploid | aneuploid        | CONCORDANT             | CONCORDANT          | +11, +15, +22          | +11, +15    | +11, +15, +22    | DISCORDANT             | CONCORDANT          |
| Pb33          | 7          | EN3     | 70                  | 100     | 86         | 174     | 62.702     | 243.733 | 0,427      | 0,320   | 1,140      | 0,857   | aneuploid     | aneuploid | aneuploid        | CONCORDANT             | CONCORDANT          | multiple               | -2, +9, -15 | +2, +9, -15      | DISCORDANT             | DISCORDANT          |
| Pb34          | 7          | EN3     | 70                  | 100     | 106        | 132     | 78.244     | 208.681 | 0,378      | 0,301   | 1,047      | 0,824   | aneuploid     | aneuploid | aneuploid        | CONCORDANT             | CONCORDANT          | -13, -15, -21          | -13, -15    | -13, -15, -21    | DISCORDANT             | CONCORDANT          |
| Pb6           | 2          | EN4     | 70                  | 90      | 86         | 170     | 79.915     | 117.144 | 0,337      | 0,339   | 1,005      | 0,927   | euploid       | euploid   | euploid          | CONCORDANT             | CONCORDANT          | -                      | -           | -                | CONCORDANT             | CONCORDANT          |
| Pb58          | 11         | EN4     | 80                  | 90      | 79         | 152     | 65.709     | 96.024  | 0,398      | 0,350   | 1,041      | 0,889   | aneuploid     | aneuploid | aneuploid        | CONCORDANT             | CONCORDANT          | -13, -14, +17          | multiple    | multiple         | DISCORDANT             | DISCORDANT          |
| Pb78          | 14         | EN4     | 90                  | 90      | 72         | 115     | 48.876     | 73.728  | 0,503      | 0,423   | 1,368      | 1,116   | aneuploid     | aneuploid | aneuploid        | CONCORDANT             | CONCORDANT          | +17, -22               | +17         | +17, -22         | DISCORDANT             | CONCORDANT          |
| Pb91          | 17         | EN4     | 80                  | 90      | 28         | 28      | 21.405     | 92.844  | 0,630      | 0,357   | 1,671      | 0,915   | aneuploid     | aneuploid | aneuploid        | CONCORDANT             | CONCORDANT          | -2, +6                 | -2, -21     | -2, +6           | DISCORDANT             | CONCORDANT          |
| Pb93          | 17         | EN4     | 80                  | 90      | 47         | 47      | 44.624     | 181.363 | 0,442      | 0,315   | 1,173      | 0,792   | aneuploid     | aneuploid | aneuploid        | CONCORDANT             | CONCORDANT          | +1, -16, +19           | +1, -16     | +1, -16          | DISCORDANT             | DISCORDANT          |
| Pb96          | 17         | EN4     | 80                  | 90      | 66         | 158     | 60.677     | 138.336 | 0,389      | 0,296   | 1,017      | 0,774   | aneuploid     | aneuploid | aneuploid        | CONCORDANT             | CONCORDANT          | +11, -16, +19          | +11, -16    | +11, -16         | DISCORDANT             | DISCORDANT          |
| Pb29          | 6          | EN5     | 96                  | 90      | 98         | 183     | 77.560     | 222.899 | 0,403      | 0,307   | 1,082      | 0,813   | euploid       | euploid   | euploid          | CONCORDANT             | CONCORDANT          | -                      | -           | -                | CONCORDANT             | CONCORDANT          |
| Pb38          | 8          | EN5     | 70                  | 90      | 110        | 190     | 82.209     | 246.494 | 0,506      | 0,448   | 1,266      | 1,122   | euploid       | aneuploid | euploid          | DISCORDANT             | CONCORDANT          | -                      | -17         | -                | DISCORDANT             | CONCORDANT          |
| Pb62          | 12         | EN5     | 77                  | 90      | 180        | 136     | 51.856     | 171.404 | 0,441      | 0,325   | 1,155      | 0,867   | aneuploid     | euploid   | euploid          | DISCORDANT             | DISCORDANT          | +19                    | -           | -                | DISCORDANT             | DISCORDANT          |
| Pb74          | 14         | EN5     | 90                  | 90      | 76         | 149     | 48.009     | 214.091 | 0,447      | 0,304   | 1,233      | 0,837   | aneuploid     | euploid   | aneuploid        | DISCORDANT             | CONCORDANT          | -16, +21               | -           | -16, +21         | DISCORDANT             | CONCORDANT          |
| Pb85          | 16         | EN5     | 100                 | 90      | 61         | 155     | 42.281     | 246.406 | 0,482      | 0,330   | 1,305      | 0,870   | aneuploid     | euploid   | euploid          | DISCORDANT             | DISCORDANT          | -16                    | -           | -                | DISCORDANT             | DISCORDANT          |
| Pb95          | 17         | EN5     | 80                  | 90      | 50         | 124     | 44.210     | 187.577 | 0,440      | 0,316   | 1,179      | 0,811   | not evaluable | euploid   | euploid          | EXCLUDED               | EXCLUDED            | not evaluable          | -           | -                | EXCLUDED               | EXCLUDED            |
